# Supplementary material for: A facile and concise route to (hydroxybenzoyl)pyrido[2,3-d]pyrimidine heterocycle derivatives: synthesis, and structural, spectral and computational exploration
Source: Royal Society of Chemistry journal article supplement (doi:10.1039/c9ra05415d), 2019-01-01
Supplement: c9ra05415d1.pdf [file c9ra05415d1.pdf]

### Supplementary material

#### **A Facile and Concise Route to Hydroxy Benzoyl Pyrido [2,3-d] Pyrimidine Heterocycles Derivatives: Synthesis, Structural, Spectral and Computational Exploration**

Abida Ashraf<sup>1,5</sup>, Muhammad Khalid,<sup>2\*</sup> Muhammad Nawaz Tahir<sup>3</sup> Muhammad Yaqub<sup>1</sup>, Muhammad Moazzam Naseer<sup>4</sup>, Ghulam Mustafa Kamal,<sup>2</sup> Bullo Saifullah<sup>2,7</sup> Atualpa Albert Carmo Braga<sup>6</sup>, Zahid Shafiq<sup>1\*</sup>, Waqar Rauf<sup>8</sup>

<sup>1</sup> Institute of Chemical Sciences, Bahauddin Zakariya University, Multan 60800, Pakistan.

<sup>2</sup>Department of Chemistry, Khwaja Fareed University of Engineering & Information Technology, Rahim Yar Khan-64200, Pakistan

<sup>3</sup>Department of Physics, University of Sargodha, Sargodha, Pakistan

<sup>6</sup>Department of Chemistry Quaid-i-Azam University Islamabad, 45320, Pakistan

<sup>5</sup>Department of Chemistry, Kutchery Campus, The Women University Multan, Multan 60000, Pakistan.

<sup>6</sup>Departamento de Química Fundamental, Instituto de Química, Universidade de São Paulo, Avenida Professor Lineu Prestes, 748, São Paulo 05508-000, Brazil

<sup>7</sup>Institute of Advanced Research Studies in Chemical Sciences, University of Sindh, Hosho Road Jamshoro Sindh 76080 Pakistan

<sup>8</sup>National Institute of Biotechnology and Genetic Engineering (NIBGE), P.O. Box 577, Faisalabad, Pakistan

Corresponding author<sup>2\*</sup> E-mail address: [muhammad.khalid@kfueit.edu.pk](mailto:muhammad.khalid@kfueit.edu.pk); [Khalid@iq.usp.br](mailto:Khalid@iq.usp.br)  
Corresponding author<sup>1\*</sup> E-mail address: [zahidshafiq25@hotmail.com](mailto:zahidshafiq25@hotmail.com)

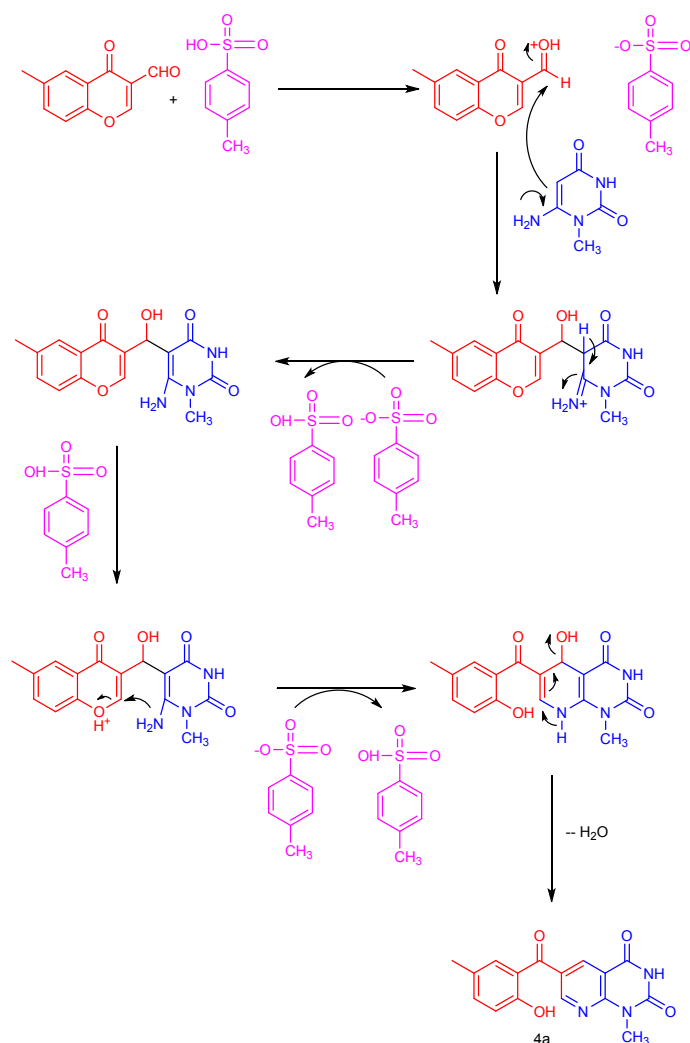

**Scheme S1:** Plausible mechanism for the synthesis of pyrido[2,3-d]pyrimidines **6a**.

**Table S1** .Comparison of XRD and DFT values of selected bond lengths and bond angles of **4a**

| Bond lengths |           |       | Bond angles |            |       |
|--------------|-----------|-------|-------------|------------|-------|
|              | EXP       | DFT   |             | EXP        | DFT   |
| O1- C1       | 1.352 (2) | 1.34  | O1-C1-C2    | 117.46(15) | 117.8 |
| O2-C8        | 1.235(2)  | 1.239 | O1-C1-C6    | 123.57(15) | 122.9 |
| O3- C14      | 1.222(2)  | 1.214 | O2-C8-C6    | 120.79(15) | 121.1 |
| O4-C15       | 1.209 (2) | 1.213 | O2-C8-C9    | 121.91(14) | 117.3 |
| N1-C12       | 1.336(2)  | 1.336 | O3-C14-N2   | 121.87(15) | 121.7 |
| N1-C13       | 1.334(2)  | 1.332 | O3-C14-C11  | 124.43(15) | 125.4 |
| N2-C14       | 1.372 (2) | 1.391 | O4-C15-N2   | 121.25(16) | 121.2 |
| N2-C15       | 1.383(2)  | 1.393 | O4-C15-N3   | 122.82(16) | 123.6 |
| N3-C12       | 1.385(2)  | 1.387 | C12-N1-C13  | 117.29(14) | 118   |
| N3-C15       | 1.386(2)  | 1.395 | N1-C12-N3   | 117.37(14) | 116.9 |
| N3-C16       | 1.464(2)  | 1.47  | N1-C12-C11  | 123.07(15) | 122.5 |
| C1-C2        | 1.384(2)  | 1.402 | N1-C13-C9   | 124.05(15) | 124.3 |
| C1-C6        | 1.415(2)  | 1.421 | C14-N2-C15  | 127.54(14) | 128.7 |

|         |          |       |            |            |       |
|---------|----------|-------|------------|------------|-------|
| C2-C3   | 1.373(3) | 1.382 | N2-C14-C11 | 113.66(14) | 113   |
| C3-C4   | 1.395(3) | 1.409 | N2-C15-N3  | 115.93(14) | 115.2 |
| C4-C5   | 1.384(2) | 1.385 | C12-N3-C15 | 121.99(14) | 122.2 |
| C4-C7   | 1.504(3) | 1.51  | C12-N3-C16 | 120.49(14) | 119.6 |
| C5-C6   | 1.402(2) | 1.414 | N3-C12-C11 | 119.57(14) | 120.6 |
| C6-C8   | 1.461(2) | 1.469 | C15-N3-C16 | 117.50(14) | 118.2 |
| C8-C9   | 1.491(2) | 1.496 | C2-C1-C6   | 118.97(16) | 119.3 |
| C9-C10  | 1.382(2) | 1.396 | C1-C2-C3   | 120.63(16) | 120.4 |
| C9-C13  | 1.399(2) | 1.402 | C1-C6-C5   | 118.71(15) | 118.4 |
| C10-C11 | 1.381(2) | 1.387 | C1-C6-C8   | 119.76(14) | 118.9 |
| C11-C12 | 1.403(2) | 1.411 | C2-C3-C4   | 122.15(16) | 121.9 |
| C11-C14 | 1.460(2) | 1.473 | C3-C4-C5   | 117.24(16) | 117.5 |

EXP=experiment, DFT=density functional theory

**Table S1** . Comparison of XRD and DFT values of selected bond angles of **4a**

|             | <b>Bond angles</b> |            |
|-------------|--------------------|------------|
|             | <b>EXP</b>         | <b>DFT</b> |
| C3-C4-C7    | 121.45(17)         | 120.7      |
| C5-C4-C7    | 121.28(17)         | 121.9      |
| C4-C5-C6    | 122.20(16)         | 122.5      |
| C5-C6-C8    | 121.40(14)         | 122.7      |
| C6-C8-C9    | 121.91(14)         | 121.6      |
| C8-C9-C10   | 117.72(14)         | 119.2      |
| C8-C9-C13   | 124.85(15)         | 123.5      |
| C10-C9-C13  | 117.40(14)         | 117        |
| C9-C10-C11  | 119.83(15)         | 119.6      |
| C10-C11-C12 | 118.11(14)         | 118.4      |
| C10-C11-C14 | 121.21(14)         | 121.3      |
| C12-C11-C14 | 120.62(14)         | 120.3      |

EXP=experiment, DFT=density functional theory

**Table S2**. Comparison of XRD and DFT values of selected bond lengths and bond angles of **4b**

|        | <b>Bond lengths</b> |            | <b>Bond angles</b> |            |       |
|--------|---------------------|------------|--------------------|------------|-------|
|        | <b>EXP</b>          | <b>DFT</b> | <b>EXP</b>         | <b>DFT</b> |       |
| F1-C4  | 1.3613(17)          | 1.356      | F1-C4-C3           | 118.16(13) | 118.8 |
| O1-C1  | 1.3508(18)          | 1.34       | F1-C4-C5           | 118.84(13) | 119.3 |
| O2-C7  | 1.2420(16)          | 1.239      | O2-C1-C2           | 117.6      | 117.4 |
| O3-C15 | 1.2120(17)          | 1.215      | O2-C1-C6           | 122.1      | 122.9 |
| O4-C14 | 1.2217(17)          | 1.212      | O2-C7-C6           | 120.79(12) | 120.7 |
| N1-C11 | 1.3361(18)          | 1.339      | O2-C7-C8           | 116.68(13) | 117.5 |
| N1-C12 | 1.3241(19)          | 1.327      | O3-C15-N3          | 121.22(12) | 121.8 |
| N2-C11 | 1.3844(17)          | 1.386      | O3-C15-C10         | 124.86(13) | 125.2 |
| N2-C13 | 1.4670(18)          | 1.471      | O4-C14-N2          | 122.28(13) | 123.6 |
| N2-C14 | 1.3677(19)          | 1.396      | O4-C14-N3          | 120.85(13) | 121.2 |
| N3-C14 | 1.3754(18)          | 1.393      | C11-N1-C12         | 116.98(12) | 117.9 |

|         |            |       |            |            |       |
|---------|------------|-------|------------|------------|-------|
| N3-C15  | 1.3776(18) | 1.39  | N1-C11-N2  | 116.70(11) | 116.8 |
| C1-C2   | 1.393(2)   | 1.403 | N1-C11-C10 | 122.92(12) | 122.5 |
| C1-C6   | 1.4145(19) | 1.423 | N1-C12-C8  | 125.11(13) | 124.5 |
| C2-C3   | 1.365(2)   | 1.383 | C11-N2-C13 | 120.38(12) | 119.7 |
| C3-C4   | 1.384(2)   | 1.394 | C11-N2-C14 | 121.87(11) | 122.1 |
| C4-C5   | 1.360(2)   | 1.374 | N2-C11-C10 | 120.38(12) | 120.7 |
| C5-C6   | 1.4091(19) | 1.413 | C13-N2-C14 | 117.75(12) | 118.2 |
| C6-C7   | 1.463(2)   | 1.472 | N2-C14-N3  | 116.86(12) | 115.2 |
| C7-C8   | 1.4951(19) | 1.493 | C14-N3-C15 | 127.17(12) | 128.6 |
| C8-C9   | 1.3873(19) | 1.393 | N3-C15-C10 | 113.92(11) | 113   |
| C8-C12  | 1.3981(9)  | 1.406 | C2-C1-C6   | 120.26(14) | 119.7 |
| C9-C10  | 1.3871(19) | 1.39  | C1-C2-C3   | 120.48(14) | 120.7 |
| C10-C11 | 1.4005(17) | 1.409 | C1-C6-C5   | 118.28(13) | 118.6 |
| C10-C15 | 1.4682(19) | 1.472 | C1-C6-C7   | 119.29(12) | 119   |

EXP=experiment, DFT=density functional theory

**Table S2** . Comparison of XRD and DFT values of selected bond angles of **4b**

| <b>Bond angles</b> |            |            |
|--------------------|------------|------------|
|                    | <b>EXP</b> | <b>DFT</b> |
| C2-C3-C4           | 118.88(14) | 119.2      |
| C3-C4-C5           | 123.00(14) | 121.9      |
| C4-C5-C6           | 119.02(13) | 119.9      |
| C5-C6-C7           | 122.42(12) | 122.4      |
| C6-C7-C8           | 122.53(12) | 121.7      |
| C7-C8-C9           | 125.98(12) | 124.6      |
| C7-C8-C12          | 116.77(12) | 118.1      |
| C9-C8-C12          | 117.11(13) | 117.1      |
| C8-C9-C10          | 119.04(12) | 119.5      |
| C9-C10-C11         | 118.8(12)  | 118.6      |
| C9-C10-C15         | 121.49(12) | 121        |

EXP=experiment, DFT=density functional theory

**Table S3** . Comparison of XRD and DFT values of selected bond lengths and bond angles of **4c**

| <b>Bond lengths</b> |            |            | <b>Bond angles</b> |            |            |
|---------------------|------------|------------|--------------------|------------|------------|
|                     | <b>EXP</b> | <b>DFT</b> |                    | <b>EXP</b> | <b>DFT</b> |
| O1-C1               | 1.349(2)   | 1.349      | O1-C1-C2           | 117.86(14) | 117.9      |
| O2-C9               | 1.2281(18) | 1.228      | O1-C1-C6           | 122.83(14) | 122.8      |
| O3-C15              | 1.2205(17) | 1.22       | O2-C9-C6           | 120.78(13) | 120.8      |
| O4-C16              | 1.2098(18) | 1.21       | O2-C9-C10          | 118.84(12) | 118.8      |
| N1-C11              | 1.3327(19) | 1.333      | O3-C15-N3          | 121.7      | 122        |
| N1-C12              | 1.3368(17) | 1.337      | O3-C15-C13         | 124.13(13) | 124.1      |
| N2-C15              | 1.3710(19) | 1.371      | O4-C16-N2          | 121.05(13) | 121        |
| N2-C16              | 1.3800(19) | 1.38       | O4-C16-N3          | 122.76(14) | 122.8      |
| N3-C12              | 1.3826(18) | 1.383      | C11-N1-C12         | 117.24(12) | 117.2      |

|         |            |       |            |            |       |
|---------|------------|-------|------------|------------|-------|
| N3-C16  | 1.3803(18) | 1.38  | N1-C11-C10 | 124.69(12) | 124.7 |
| N3-C17  | 1.4680(18) | 1.468 | N1-C12-N3  | 116.82(12) | 116.8 |
| C1-C2   | 1.394(2)   | 1.394 | N1-C12-C13 | 122.69(13) | 122.7 |
| C1-C6   | 1.408(2)   | 1.408 | C15-N2-C16 | 127.74(12) | 127.7 |
| C2-C3   | 1.369(3)   | 1.369 | N2-C15-C13 | 113.84(12) | 113.8 |
| C3-C4   | 1.393(2)   | 1.393 | N2-C16-N3  | 116.20(13) | 116.2 |
| C4-C5   | 1.385(2)   | 1.385 | C12-N3-C16 | 121.68(12) | 121.7 |
| C4-C7   | 1.502(2)   | 1.502 | C12-N3-C17 | 120.79(11) | 120.8 |
| C5-C6   | 1.397(2)   | 1.397 | N3-C12-C13 | 120.49(12) | 120.5 |
| C6-C9   | 1.4795(19) | 1.479 | C16-N3-C17 | 117.51(12) | 117.5 |
| C7-C8   | 1.507(2)   | 1.508 | C2-C1-C6   | 119.29(15) | 119.3 |
| C9-C10  | 1.491(2)   | 1.49  | C1-C2-C3   | 120.23(15) | 120.2 |
| C10-C11 | 1.394(2)   | 1.394 | C1-C6-C5   | 118.40(13) | 118.4 |
| C10-C14 | 1.3903(18) | 1.39  | C1-C6-C9   | 118.98(13) | 119   |
| C12-C13 | 1.3999(19) | 1.4   | C2-C3-C4   | 122.24(14) | 122.2 |
| C13-C14 | 1.3821(19) | 1.382 | C3-C4-C5   | 117.13(14) | 117.1 |
| C13-C15 | 1.4638(18) | 1.464 | C3-C4-C7   | 121.93(14) | 121.9 |

EXP=experiment, DFT=density functional theory

**Table S3** . Comparison of XRD and DFT values of selected bond angles of **4c**

| <b>Bond angles</b> |            |            |
|--------------------|------------|------------|
|                    | <b>EXP</b> | <b>DFT</b> |
| C5-C6-C9           | 122.62(13) | 122.6      |
| C6-C9-C10          | 120.37(12) | 120.4      |
| C9-C10-C11         | 124.37(12) | 124.4      |
| C9-C10-C14         | 118.55(13) | 118.5      |
| C11-C10-C14        | 116.86(13) | 116.9      |
| C10-C14-C13        | 119.54(13) | 119.5      |
| C12-C13-C14        | 118.63(12) | 118.6      |
| C12-C13-C15        | 119.82(13) | 119.8      |
| C14-C13-C15        | 121.53(12) | 121.5      |
| C5-C6-C9           | 122.62(13) | 122.6      |
| C6-C9-C10          | 120.37(12) | 120.4      |
| C9-C10-C11         | 124.37(12) | 124.4      |

EXP=experiment, DFT=density functional theory

**Table S4**. Comparison of XRD and DFT values of selected bond lengths and bond angles of **4d**

| <b>Bond lengths</b> |            |            | <b>Bond angles</b> |            |            |
|---------------------|------------|------------|--------------------|------------|------------|
|                     | <b>EXP</b> | <b>DFT</b> |                    | <b>EXP</b> | <b>DFT</b> |
| O1-C2               | 1.352(2)   | 1.341      | O1-C2-C1           | 122.48(16) | 123        |
| O2-C10              | 1.232 (2)  | 1.24       | O1-C2-C3           | 118.26(16) | 117.8      |
| O3-C16              | 1.210 (2)  | 1.215      | O2-C10-C1          | 121.55(16) | 121.2      |
| O4-C17              | 1.205(2)   | 1.213      | O2-C10-C11         | 117.13(16) | 117.2      |
| N1-C14              | 1.332(2)   | 1.339      | O3-C16-N2          | 121.78(17) | 121.7      |
| N1-C15              | 1.323(2)   | 1.328      | O3-C16-C13         | 124.24(17) | 125.3      |

|         |          |       |            |             |       |
|---------|----------|-------|------------|-------------|-------|
| N2-C16  | 1.368(2) | 1.39  | O4-C17-N2  | 121.46(18)  | 121.1 |
| N2-C17  | 1.377(2) | 1.394 | O4-C17-N3  | 122.69(18)  | 123.7 |
| N3-C14  | 1.384(2) | 1.387 | C14-N1-C15 | 116.70(15)  | 117.9 |
| N3-C17  | 1.377(2) | 1.395 | N1-C14-N3  | 116.66(15)  | 116.8 |
| N3-C18  | 1.462(2) | 1.471 | N1-C14-C13 | 123.26(16)  | 122.5 |
| C1-C2   | 1.412(2) | 1.421 | N1-C15-C11 | 125.03(16)  | 124.5 |
| C1-C6   | 1.399(2) | 1.414 | C16-N2-C17 | 127.81(16)  | 128.6 |
| C1-C10  | 1.458(2) | 1.468 | N2-C16-C13 | 113.97(15)  | 113   |
| C2-C3   | 1.378(3) | 1.401 | N2-C17-N3  | 115.83(15)  | 115.2 |
| C3-C4   | 1.375(3) | 1.382 | C14-N3-C17 | 122.24(15)  | 122.1 |
| C4-C5   | 1.397(3) | 1.409 | C14-N3-C18 | 120.25(16)  | 119.7 |
| C5-C6   | 1.374(2) | 1.385 | N3-C14-C13 | 120.08(16)  | 120.7 |
| C5-C7   | 1.517(2) | 1.522 | C17-N3-C18 | 117.44(16)  | 118.2 |
| C7-C8   | 1.505(3) | 1.54  | C2-C1-C6   | 118.09(16)  | 118.3 |
| C7-C9   | 1.502(3) | 1.54  | C2-C1-C10  | 119.45(16)  | 118.9 |
| C10-C11 | 1.491(2) | 1.496 | C1-C2-C3   | 119.25(17)  | 119.2 |
| C11-C12 | 1.376(2) | 1.393 | C6-C1-C10  | 122.49(15)  | 122.8 |
| C11-C15 | 1.393(2) | 1.406 | C1-C6-C5   | 122.98(16)  | 122.7 |
| C12-C13 | 1.380(2) | 1.391 | C1-C10-C11 | 121.329(15) | 121.7 |
| C13-C14 | 1.392(2) | 1.409 | C2-C3-C4   | 120.71(18)  | 120.5 |
| C13-C16 | 1.463(2) | 1.471 | C3-C4-C5   | 121.71(18)  | 121.9 |

EXP=experiment, DFT=density functional theory

**Table S4** . Comparison of XRD and DFT values of selected bond angles of **4d**

| Bond angles |            |       |
|-------------|------------|-------|
|             | EXP        | DFT   |
| C4-C5-C6    | 117.07(18) | 117.3 |
| C4-C5-C7    | 123.37(17) | 121.6 |
| C6-C5-C7    | 119.55(17) | 121.1 |
| C5-C7-C8    | 110.62(17) | 112   |
| C5-C7-C9    | 114.50(19) | 111.9 |
| C8-C7-C9    | 110.85(19) | 111.1 |
| C10-C11-C12 | 124.81(15) | 124.5 |
| C10-C11-C15 | 118.00(15) | 118.3 |
| C12-C11-C15 | 116.99(15) | 117   |
| C11-C12-C13 | 119.63(16) | 119.5 |
| C12-C13-C14 | 118.37(16) | 118.6 |
| C12-C13-C16 | 121.57(15) | 121.1 |
| C14-C13-C16 | 120.06(15) | 120.4 |

EXP=experiment, DFT=density functional theory

**Table S5:** Experimental and DFT based vibrational frequencies of **6a**

| Experimental | DFT | Intensity | Vibrational assignments |
|--------------|-----|-----------|-------------------------|
|--------------|-----|-----------|-------------------------|

| Frequency | Frequency |        |                                                                  |
|-----------|-----------|--------|------------------------------------------------------------------|
| 3217      | 3594      | 99.97  | $\nu(\text{N-H})$                                                |
| 3092      | 3382      | 360.15 | $\nu(\text{O-H})$                                                |
|           | 3205      | 3.68   | $\nu(\text{C-H}_{\text{Py}})$                                    |
|           | 3197      | 4.26   | $\nu_{\text{s}}(\text{C-H}_{\text{Ben}})$                        |
|           | 3170      | 11.73  | $\nu(\text{C-H}_{\text{Py}})$                                    |
|           | 3130      | 10.76  | $\nu_{\text{as}}(\text{C-H}_{\text{CH}_3})$                      |
|           | 3102      | 14.08  | $\nu_{\text{as}} + \nu(\text{C-H}_{\text{CH}_3})$                |
|           | 3067      | 21.87  | $\nu_{\text{s}}(\text{C-H}_{\text{CH}_3})$                       |
|           | 3023      | 34.24  | $\nu_{\text{s}}(\text{C-H}_{\text{CH}_3})$                       |
| 1717      | 1778      | 566.91 | $\nu(\text{C=O})$                                                |
| 1697      | 1770      | 796.06 | $\nu(\text{C=O})$                                                |
| 1625      | 1671      | 216.91 | $\nu(\text{C=O})$                                                |
|           | 1629      | 421.93 | $\nu(\text{C=O})$                                                |
|           | 1615      | 214.40 | $\rho(\text{C-H}_{\text{Ben}}) + \rho(\text{O-H})$               |
| 1570      | 1595      | 78.49  | $\rho(\text{C-H}_{\text{Py}}) + \nu(\text{C=C-C=N}_{\text{Py}})$ |
| 1474      | 1544      | 307.26 | $\rho(\text{N-H})$                                               |
|           | 1516      | 199.69 | $\delta(\text{C-H}_{\text{CH}_3}) + \rho(\text{O-H})$            |
|           | 1494      | 12.26  | $\delta(\text{C-H}_{\text{CH}_3})$                               |
|           | 1438      | 10.39  | $\delta_{\text{s}}(\text{C-H}_{\text{CH}_3})$                    |
|           | 1409      | 112.62 | $\rho(\text{C-H}_{\text{CH}_3}) + \rho(\text{O-H})$              |
| 1373      | 1383      | 133.14 | $\delta_{\text{s}}(\text{C-H}_{\text{CH}_3}) + \rho(\text{N-H})$ |
| 1329      | 1357      | 303.48 | $\rho(\text{C-H}_{\text{Py}}) + \rho(\text{O-H})$                |
|           | 1282      | 108.63 | $\rho(\text{C-H}_{\text{Py}})$                                   |
|           | 1276      | 142.38 | $\rho(\text{C-H}_{\text{Py}}) + \rho(\text{C-H}_{\text{CH}_3})$  |
|           | 1242      | 266.10 | $\rho(\text{C-H}_{\text{Ben}}) + \rho(\text{O-H})$               |
| 1184      | 1227      | 29.69  | $\rho(\text{C-H}_{\text{Ben}})$                                  |

|     |      |       |                                                                                             |
|-----|------|-------|---------------------------------------------------------------------------------------------|
|     | 1179 | 50.46 | $\rho(\text{C-H}_{\text{CH}_3}) + \rho(\text{N-H})$                                         |
|     | 1166 | 16.40 | $\rho + \delta(\text{C-H}_{\text{Ben}})$                                                    |
|     | 1138 | 4.88  | $\rho(\text{C-H}_{\text{Py}})$                                                              |
|     | 1086 | 22.14 | $\rho(\text{C-H}_{\text{CH}_3}) + \rho(\text{C-H}_{\text{Py}})$                             |
|     | 1066 | 2.42  | $\rho(\text{C-H}_{\text{CH}_3})$                                                            |
|     | 1032 | 2.05  | $\rho(\text{C-H}_{\text{CH}_3})$                                                            |
|     | 1003 | 30.67 | $\rho(\text{C-H}_{\text{CH}_3})$                                                            |
| 943 | 992  | 9.56  | $\delta_{\text{as}}(\text{C-H}_{\text{Py}})$                                                |
|     | 966  | 17.82 | $\rho(\text{C-H}_{\text{CH}_3}) + \rho(\text{N-H})$                                         |
|     | 925  | 4.84  | $\rho(\text{C-H}_{\text{CH}_3}) + \nu(\text{C=C-C=C}_{\text{Ben}})$                         |
|     | 851  | 8.07  | $\delta_{\text{s}}(\text{C-H}_{\text{Ben}})$                                                |
| 807 | 825  | 82.06 | $\rho(\text{O-H})$                                                                          |
|     | 800  | 19.00 | $\rho(\text{C-H}_{\text{Ben}}) + \rho(\text{C-H}_{\text{CH}_3})$                            |
|     | 791  | 29.86 | $\rho(\text{O-H})$                                                                          |
| 725 | 753  | 25.32 | $\rho(\text{C=O})$                                                                          |
|     | 707  | 15.56 | $\delta_{\text{as}}(\text{C-H}_{\text{Ben}}) + \delta_{\text{s}}(\text{N-H})$               |
| 677 | 690  | 33.38 | $\nu(\text{C=C-C=C}_{\text{Ben}})$                                                          |
|     | 661  | 54.60 | $\delta_{\text{s}}(\text{N-H})$                                                             |
|     | 603  | 1.84  | $\delta_{\text{s}}(\text{C-H}_{\text{Py}})$                                                 |
|     | 546  | 12.49 | $\delta_{\text{s}}(\text{C-H}_{\text{Ben}}) + \delta_{\text{as}}(\text{C-H}_{\text{CH}_3})$ |
|     | 515  | 49.64 | $\rho(\text{O-H}) + \nu(\text{C=C-C=N}_{\text{Py}})$                                        |
|     | 486  | 21.30 | $\rho(\text{C-H}_{\text{CH}_3}) + \rho(\text{O-H})$                                         |
|     | 402  | 22.45 | $\rho(\text{C-O}) + \rho(\text{C-H}_{\text{CH}_3})$                                         |
|     | 366  | 6.52  | $\rho(\text{C-H}_{\text{CH}_3}) + \rho(\text{O-H})$                                         |
|     | 337  | 6.77  | $\delta_{\text{as}}(\text{C-H}_{\text{Ben}}) + \rho(\text{C-H}_{\text{CH}_3})$              |
|     | 319  | 3.12  | $\rho(\text{C-H}_{\text{CH}_3})$                                                            |
|     | 293  | 3.69  | $\rho(\text{C-H}_{\text{CH}_3}) + \rho(\text{C-H}_{\text{Py}})$                             |
|     | 225  | 3.67  | $\rho(\text{C-H}_{\text{CH}_3})$                                                            |
|     | 171  | 1.78  | $\rho(\text{C-H}_{\text{CH}_3})$                                                            |
|     | 156  | 3.91  | $\rho(\text{C-H}_{\text{CH}_3})$                                                            |
|     | 111  | 0.6   | $\rho(\text{C-H}_{\text{CH}_3})$                                                            |
|     | 72   | 0.26  | $\rho(\text{C-H}_{\text{CH}_3})$                                                            |
|     | 27   | 0.13  | $\delta_{\text{s}}(\text{C-H}_{\text{CH}_3})$                                               |

$\delta$  Scissoring,  $\nu_{\text{s}}$  symmetric,  $\nu_{\text{as}}$  asymmetric,  $\rho$  rocking,  $\delta_{\text{s}}$  symmetric bending vibration (wagging),  $\delta_{\text{as}}$  asymmetric bending vibration (twisting),  $\nu$  is stretching vibration, in compound. (Ben) is benzene. Intensity in (km/mol) and Frequency in  $\nu(\text{cm}^{-1})$ .

**Table S6:** Experimental and DFT based vibrational frequencies of **6b**

| Experimental Frequency | DFT Frequency | Intensity | Vibrational assignments                   |
|------------------------|---------------|-----------|-------------------------------------------|
| 3119-3026              | 3592          | 96.83     | $\nu(\text{N-H})$                         |
| 3163                   | 3395          | 333.11    | $\nu(\text{O-H})$                         |
|                        | 3207          | 0.82      | $\nu(\text{C-H}_{\text{Ben}})$            |
|                        | 3194          | 1.59      | $\nu_{\text{s}}(\text{C-H}_{\text{Ben}})$ |
|                        | 3179          | 2.01      | $\nu(\text{C-H}_{\text{Py}})$             |
|                        | 3133          | 9.92      |                                           |



---

|           |      |        | $\nu_{as}(\text{C-H}_{\text{CH}_3})$                                |
|-----------|------|--------|---------------------------------------------------------------------|
| 2837      | 3069 | 22.52  | $\nu_s(\text{C-H}_{\text{CH}_3})$                                   |
| 1721      | 1780 | 633.13 | $\nu(\text{C=O})$                                                   |
| 1675-1589 | 1768 | 702.70 | $\nu(\text{C=O}) + \rho(\text{N-H})$                                |
|           | 1672 | 91.51  | $\rho(\text{H-O}) + \nu(\text{C=C-C=C}_{\text{Ben}})$               |
|           | 1635 | 602.59 | $\rho(\text{C-H}_{\text{Py}}) + \nu(\text{C=C-C=N}_{\text{Py}})$    |
|           | 1615 | 118.24 | $\rho(\text{C-H}_{\text{Ben}}) + \rho(\text{O-H})$                  |
|           | 1595 | 70.83  | $\rho(\text{C-H}_{\text{Py}}) + \nu(\text{C=C-C=N}_{\text{Py}})$    |
|           | 1523 | 265.78 | $\rho(\text{C-H}_{\text{CH}_3})$                                    |
|           | 1510 | 335.44 | $\rho(\text{C-H}_{\text{Ben}}) + \rho(\text{O-H})$                  |
| 1465      | 1495 | 13.17  | $\rho(\text{C-H}_{\text{CH}_3})$                                    |
|           | 1468 | 68.11  | $\delta_s(\text{C-H}_{\text{CH}_3})$                                |
|           | 1404 | 114.37 | $\rho(\text{C-H}_{\text{Ben}}) + \rho(\text{O-H})$                  |
| 1326      | 1379 | 126.24 | $\delta_s(\text{C-H}_{\text{CH}_3}) + \rho(\text{C-H}_{\text{Py}})$ |
|           | 1346 | 290.29 | $\rho(\text{C-H}_{\text{Py}}) + \rho(\text{O-H})$                   |
|           | 1284 | 48.64  | $\rho(\text{C-H}_{\text{Py}})$                                      |
| 1280      | 1274 | 277.61 | $\rho(\text{C-H}_{\text{Ben}}) + \rho(\text{C-H}_{\text{CH}_3})$    |
| 1222      | 1241 | 405.43 | $\rho(\text{C-H}_{\text{Ben}}) + \rho(\text{O-H})$                  |
|           | 1211 | 36.72  | $\rho + \delta(\text{C-H}_{\text{Ben}})$                            |

---

|      |      |       |                                                                                             |
|------|------|-------|---------------------------------------------------------------------------------------------|
| 1172 | 1178 | 43.62 | $\rho(\text{C-H}_{\text{CH}_3}) + \rho(\text{N-H})$                                         |
|      | 1156 | 26.27 | $\rho + \delta(\text{C-H}_{\text{Ben}})$                                                    |
| 1069 | 1145 | 9.13  | $\rho(\text{C-H}_{\text{Py}}) + \delta(\text{C-H}_{\text{Ben}})$                            |
|      | 1086 | 22.78 | $\rho(\text{C-H}_{\text{CH}_3}) + \rho(\text{C-H}_{\text{Py}})$                             |
| 988  | 1007 | 25.66 | $\rho(\text{C-H}_{\text{Ben}})$                                                             |
|      | 998  | 19.25 | $\delta_{\text{as}}(\text{C-H}_{\text{Py}})$                                                |
|      | 968  | 20.66 | $\rho(\text{C-H}_{\text{CH}_3}) + \rho(\text{N-H})$                                         |
| 869  | 941  | 10.02 | $\rho(\text{N-H}) + \nu(\text{C=C-C=C}_{\text{Ben}})$                                       |
|      | 851  | 22.84 | $\delta_{\text{s}}(\text{C-H}_{\text{Ben}})$                                                |
| 834  | 844  | 63.69 | $\rho(\text{N-H})$                                                                          |
|      | 816  | 69.12 | $\rho(\text{O-H})$                                                                          |
| 786  | 793  | 12.71 | $\delta_{\text{s}}(\text{C-H}_{\text{Py}})$                                                 |
|      | 736  | 29.94 | $\delta_{\text{s}}(\text{C=O})$                                                             |
| 680  | 714  | 8.99  | $\rho(\text{C-H}_{\text{Py}}) + \rho(\text{N-H})$                                           |
|      | 691  | 34.52 | $\nu(\text{C=C-C=C}_{\text{Ben}})$                                                          |
|      | 663  | 52.32 | $\delta_{\text{s}}(\text{N-H})$                                                             |
|      | 610  | 15.02 | $\delta_{\text{s}}(\text{C-H}_{\text{Py}})$                                                 |
|      | 551  | 5.27  | $\delta_{\text{s}}(\text{C-H}_{\text{Ben}})$                                                |
|      | 518  | 34.44 | $\rho(\text{O-H}) + \rho(\text{C-H}_{\text{Ben}})$                                          |
|      | 478  | 8.34  | $\rho(\text{C-H}_{\text{CH}_3}) + \rho(\text{O-H})$                                         |
|      | 408  | 20.46 | $\rho(\text{C=O}) + \rho(\text{C-H}_{\text{CH}_3})$                                         |
|      | 385  | 1.51  | $\rho(\text{C-H}_{\text{CH}_3}) + \rho(\text{O-H})$                                         |
|      | 324  | 7.42  | $\rho(\text{C-H}_{\text{CH}_3})$                                                            |
|      | 312  | 3.69  | $\rho(\text{C-H}_{\text{CH}_3}) + \rho(\text{C-H}_{\text{Ben}})$                            |
|      | 229  | 4.55  | $\delta_{\text{as}}(\text{C-H}_{\text{CH}_3}) + \delta_{\text{as}}(\text{C-H}_{\text{Py}})$ |
|      | 209  | 1.92  | $\rho(\text{C-H}_{\text{CH}_3}) + \rho(\text{O-H})$                                         |
|      | 171  | 2.61  | $\rho(\text{C-H}_{\text{CH}_3}) + \rho(\text{C=O})$                                         |
|      | 149  | 5.02  | $\rho(\text{C-H}_{\text{CH}_3})$                                                            |
|      | 111  | 0.51  | $\rho(\text{C-H}_{\text{CH}_3})$                                                            |
|      | 75   | 0.69  | $\rho(\text{C-H}_{\text{CH}_3})$                                                            |
|      | 27   | 0.52  | $\delta_{\text{s}}(\text{C-H}_{\text{CH}_3})$                                               |

$\delta$  Scissoring,  $\nu_{\text{s}}$  symmetric,  $\nu_{\text{as}}$  asymmetric,  $\rho$  rocking,  $\delta_{\text{s}}$  symmetric bending vibration (wagging),  $\delta_{\text{as}}$  asymmetric bending vibration (twisting),  $\nu$  is stretching vibration, in compound. (Ben) is benzene. Intensity in (km/mol) and Frequency in  $\nu(\text{cm}^{-1})$ .

**Table S7:** Experimental and DFT based vibrational frequencies of **6c**

| Experimental Frequency | DFT Frequency | Intensity | Vibrational assignments                                      |
|------------------------|---------------|-----------|--------------------------------------------------------------|
| 3168                   | 3594          | 100.28    | $\nu(\text{N-H})$                                            |
| 3131-3045              | 3385          | 365.09    | $\nu(\text{O-H})$                                            |
|                        | 3207          | 3.72      | $\nu(\text{C-H}_{\text{Py}})$                                |
|                        | 3196          | 4.53      | $\nu_{\text{s}}(\text{C-H}_{\text{Ben}})$                    |
|                        | 3171          | 12.57     | $\nu(\text{C-H}_{\text{Py}})$                                |
|                        | 3159          | 12.71     | $\nu_{\text{as}}(\text{C-H}_{\text{Ben}})$                   |
|                        | 3130          | 10.74     | $\nu_{\text{as}}(\text{C-H}_{\text{CH}_3})$                  |
|                        | 3091          | 43.08     | $\nu_{\text{s}} + \nu_{\text{as}}(\text{C-H}_{\text{CH}_3})$ |
|                        | 2936          | 3025      | 34.21                                                        |

|           |      |        |                                                                                                                  |
|-----------|------|--------|------------------------------------------------------------------------------------------------------------------|
| 1720      | 1779 | 565.30 | $\nu_s(\text{C-H}_{\text{CH}_3})$                                                                                |
| 1721-1685 | 1770 | 796.26 | $\nu(\text{C=O})$                                                                                                |
|           | 1669 | 261.74 | $\nu(\text{C=O}) + \rho(\text{N-H})$                                                                             |
| 1628      | 1628 | 417.69 | $\rho(\text{O-H}) + \nu(\text{C=C-C=C}_{\text{Ben}})$                                                            |
|           | 1614 | 186.69 | $\nu(\text{C=O}) + \nu(\text{C=C-C=N}_{\text{Py}})$                                                              |
|           | 1596 | 78.16  | $\rho(\text{C-H}_{\text{Ben}}) + \rho(\text{O-H})$                                                               |
|           |      |        | $\rho(\text{C-H}_{\text{Py}}) + \nu(\text{C=C-C=N}_{\text{Py}})$                                                 |
|           | 1523 | 190.75 | $\delta(\text{C-H}_{\text{CH}_3})$                                                                               |
|           | 1513 | 207.21 | $\delta(\text{C-H}_{\text{CH}_3}) + \rho(\text{C-H}_{\text{Ben}})$                                               |
| 1478      | 1497 | 10.37  | $\delta(\text{C-H}_{\text{CH}_3})$                                                                               |
|           | 1424 | 26.51  | $\delta_s(\text{C-H}_{\text{CH}_3}) + \rho(\text{N-H})$                                                          |
|           | 1407 | 127.73 | $\rho(\text{C-H}_{\text{Ben}}) + \rho(\text{O-H})$                                                               |
| 1376      | 1384 | 124.67 | $\delta_s(\text{C-H}_{\text{CH}_3}) + \rho(\text{N-H})$                                                          |
| 1329      | 1332 | 352.21 | $\rho(\text{C-H}_{\text{Ben}}) + \rho(\text{C-H}_{\text{Py}})$                                                   |
|           | 1287 | 212.65 | $\rho(\text{C-H}_{\text{CH}_3}) + \delta_{\text{as}}(\text{C-H}_{\text{CH}_2})$                                  |
| 1252      | 1267 | 102.21 | $\delta_{\text{as}}(\text{C-H}_{\text{CH}_2}) + \delta_{\text{as}}(\text{C-H}_{\text{CH}_3}) + \rho(\text{O-H})$ |
|           | 1240 | 265.88 | $\rho(\text{C-H}_{\text{Ben}}) + \rho(\text{O-H})$                                                               |
| 1205      | 1225 | 37.60  | $\rho(\text{C-H}_{\text{Ben}}) + \delta_s(\text{C-H}_{\text{CH}_2})$                                             |

|      |      |       |                                                                                                                              |
|------|------|-------|------------------------------------------------------------------------------------------------------------------------------|
|      | 1180 | 51.63 | $\rho(\text{C-H}_{\text{CH}_3}) + \rho(\text{N-H})$                                                                          |
|      | 1166 | 18.80 | $\rho + \delta(\text{C-H}_{\text{Ben}})$                                                                                     |
|      | 1139 | 5.31  | $\rho(\text{C-H}_{\text{Py}})$                                                                                               |
| 1067 | 1087 | 13.70 | $\delta_{\text{as}}(\text{C-H}_{\text{CH}_3}) + \delta_{\text{as}}(\text{C-H}_{\text{CH}_2}) + \rho(\text{C-H}_{\text{Py}})$ |
|      | 1087 | 11.19 | $\rho(\text{C-H}_{\text{CH}_3}) + \delta_{\text{as}}(\text{C-H}_{\text{CH}_2})$                                              |
|      | 1075 | 6.59  | $\delta_{\text{as}}(\text{C-H}_{\text{CH}_3}) + \delta_{\text{as}}(\text{C-H}_{\text{CH}_2})$                                |
|      | 1013 | 22.26 | $\rho(\text{C-H}_{\text{Ben}})$                                                                                              |
|      | 996  | 9.40  | $\delta_{\text{as}}(\text{C-H}_{\text{Py}})$                                                                                 |
| 940  | 967  | 19.23 | $\rho(\text{C-H}_{\text{CH}_3})$                                                                                             |
| 862  | 912  | 9.72  | $\rho(\text{C-H}_{\text{CH}_3}) + \rho(\text{N-H})$                                                                          |
|      | 857  | 12.03 | $\delta_{\text{s}}(\text{C-H}_{\text{Ben}})$                                                                                 |
| 821  | 833  | 71.68 | $\rho(\text{O-H}) + \nu(\text{C=C-C=C}_{\text{Ben}})$                                                                        |
|      | 823  | 70.95 | $\rho(\text{O-H})$                                                                                                           |
| 786  | 799  | 17.75 | $\rho(\text{C-H}_{\text{CH}_3})$                                                                                             |
| 750  | 752  | 24.30 | $\nu(\text{C=O})$                                                                                                            |
| 710  | 710  | 18.98 | $\delta_{\text{s}}(\text{C-H}_{\text{Ben}}) + \delta_{\text{s}}(\text{N-H})$                                                 |
| 672  | 690  | 24.21 | $\nu(\text{C=C-C=C}_{\text{Ben}}) + \delta_{\text{as}}(\text{C-H}_{\text{CH}_3})$                                            |
|      | 663  | 58.04 | $\delta_{\text{s}}(\text{N-H})$                                                                                              |
|      | 612  | 5.92  | $\delta_{\text{s}}(\text{C-H}_{\text{Ben}}) + \delta_{\text{s}}(\text{N-H})$                                                 |
|      | 563  | 7.91  | $\delta_{\text{s}}(\text{C-H}_{\text{Ben}}) + \delta_{\text{as}}(\text{C-H}_{\text{Py}})$                                    |
|      | 515  | 48.97 | $\rho(\text{O-H}) + \nu(\text{C=C-C=N}_{\text{Py}})$                                                                         |
|      | 483  | 16.37 | $\rho(\text{C-H}_{\text{Ben}}) + \rho(\text{O-H})$                                                                           |
|      | 404  | 23.46 | $\rho(\text{C=O}) + \rho(\text{C-H}_{\text{CH}_3})$                                                                          |
|      | 367  | 5.79  | $\rho(\text{C-H}_{\text{CH}_3}) + \rho(\text{O-H})$                                                                          |
|      | 326  | 3.15  | $\rho(\text{C-H}_{\text{Py}}) + \rho(\text{C-H}_{\text{CH}_3})$                                                              |
|      | 301  | 7.21  | $\rho(\text{C-H}_{\text{CH}_3})$                                                                                             |
|      | 246  | 0.37  | $\rho(\text{C-H}_{\text{CH}_3})$                                                                                             |
|      | 214  | 3.92  | $\rho(\text{C-H}_{\text{CH}_3})$                                                                                             |
|      | 166  | 2.41  | $\rho(\text{C-H}_{\text{CH}_3}) + \delta_{\text{as}}(\text{C-H}_{\text{Py}})$                                                |
|      | 146  | 1.96  | $\rho(\text{C-H}_{\text{CH}_3})$                                                                                             |
|      | 109  | 0.53  | $\rho(\text{C-H}_{\text{CH}_3})$                                                                                             |
|      | 74   | 0.79  | $\rho(\text{C-H}_{\text{CH}_3})$                                                                                             |
|      | 25   | 0.14  | $\rho(\text{C-H}_{\text{CH}_3})$                                                                                             |

$\delta$  Scissoring,  $\nu_{\text{s}}$  symmetric,  $\nu_{\text{as}}$  asymmetric,  $\rho$  rocking,  $\delta_{\text{s}}$  symmetric bending vibration (wagging),  $\delta_{\text{as}}$  asymmetric bending vibration (twisting),  $\nu$  is stretching vibration, in compound. (Ben) is benzene. Intensity in (km/mol) and Frequency in  $\nu(\text{cm}^{-1})$ .

**Table S8:** Experimental and DFT based vibrational frequencies of **6d**

| Experimental Frequency | DFT Frequency | Intensity | Vibrational assignments                                      |
|------------------------|---------------|-----------|--------------------------------------------------------------|
| 3051-2963              | 3594          | 93.38     | $\nu(\text{N-H})$                                            |
| 3168-3051              | 3391          | 343.14    | $\nu(\text{O-H})$                                            |
| 2950                   | 3204          | 1.20      | $\nu(\text{C-H}_{\text{Py}})$                                |
|                        | 3196          | 5.31      | $\nu_{\text{s}}(\text{C-H}_{\text{Ben}})$                    |
|                        | 3183          | 5.98      | $\nu(\text{C-H}_{\text{Ben}})$                               |
|                        | 3168          | 10.34     | $\nu_{\text{as}}(\text{C-H}_{\text{Ben}})$                   |
|                        | 3132          | 10.16     | $\nu_{\text{as}}(\text{C-H}_{\text{CH}_3})$                  |
|                        | 3096          | 33.63     | $\nu_{\text{s}} + \nu_{\text{as}}(\text{C-H}_{\text{CH}_3})$ |

|      |      |        |                                                                                                   |
|------|------|--------|---------------------------------------------------------------------------------------------------|
|      | 3093 | 22.21  | $\nu_s + \nu_{as}(\text{C-H}_{\text{CH}_3})$                                                      |
|      | 3087 | 65.57  | $\nu_{as}(\text{C-H}_{\text{CH}_3})$                                                              |
|      | 3068 | 23.42  | $\nu_s(\text{C-H}_{\text{CH}_3})$                                                                 |
|      | 3025 | 35.50  | $\nu_s(\text{C-H}_{\text{CH}_3})$                                                                 |
|      | 3020 | 23.61  | $\nu_s(\text{C-H}_{\text{CH}_3})$                                                                 |
|      | 3017 | 7.72   | $\nu(\text{C-H})$                                                                                 |
| 1717 | 1778 | 655.11 | $\nu(\text{C=O})$                                                                                 |
| 1677 | 1765 | 691.36 | $\nu(\text{C=O}) + \rho(\text{N-H})$                                                              |
|      | 1667 | 225.78 | $\rho(\text{O-H}) + \nu(\text{C=C-C=C}_{\text{Ben}}) + \delta(\text{C-H}_{\text{Ben}})$           |
| 1571 | 1646 | 117.34 | $\nu(\text{C=O}) + \nu(\text{C=C-C=N}_{\text{Py}})$                                               |
|      | 1632 | 464.76 | $\nu(\text{C-O}) + \nu(\text{C=C-C=N}_{\text{Py}})$                                               |
|      | 1613 | 163.26 | $\rho(\text{C-H}_{\text{Ben}}) + \rho(\text{O-H})$                                                |
|      | 1596 | 76.87  | $\rho(\text{C-H}_{\text{Py}}) + \nu(\text{C=C-C=N}_{\text{Py}})$                                  |
|      | 1522 | 262.94 | $\delta(\text{C-H}_{\text{CH}_3})$                                                                |
|      | 1515 | 187.88 | $\delta(\text{C-H}_{\text{CH}_3}) + \rho(\text{C-H}_{\text{Ben}}) + \rho(\text{O-H})$             |
|      | 1507 | 33.06  | $\delta(\text{C-H}_{\text{CH}_3})$                                                                |
| 1474 | 1502 | 22.99  | $\delta(\text{C-H}_{\text{CH}_3})$                                                                |
|      | 1495 | 12.51  | $\delta(\text{C-H}_{\text{CH}_3})$                                                                |
|      | 1468 | 63.58  | $\delta(\text{C-H}_{\text{CH}_3})$                                                                |
|      | 1422 | 10.66  | $\delta_s(\text{C-H}_{\text{CH}_3})$                                                              |
| 1336 | 1408 | 172.16 | $\rho(\text{O-H}) + \rho(\text{C-H}_{\text{Ben}})$                                                |
|      | 1386 | 37.70  | $\rho(\text{N-H}) + \rho(\text{C-H})$                                                             |
|      | 1379 | 108.49 | $\delta_s(\text{C-H}_{\text{CH}_3}) + \rho(\text{N-H})$                                           |
|      | 1369 | 38.10  | $\rho(\text{C-H}_{\text{Py}}) + \rho(\text{C-H})$                                                 |
|      | 1331 | 380.88 | $\rho(\text{C-H}_{\text{Ben}}) + \nu(\text{C=C-C=C}_{\text{Ben}}) + \rho(\text{C-H}_{\text{Py}})$ |
|      | 1315 | 78.81  | $\nu(\text{C=C-C=N}_{\text{Py}}) + \rho(\text{C-H}_{\text{Py}})$                                  |
|      | 1284 | 60.75  | $\rho(\text{C-H}_{\text{Py}})$                                                                    |
| 1209 | 1280 | 294.05 | $\rho(\text{C-H}_{\text{Ben}}) + \delta(\text{C-H}_{\text{Ben}})$                                 |
|      | 1245 | 257.10 | $\rho(\text{C-H}_{\text{Ben}}) + \rho(\text{O-H})$                                                |
|      | 1232 | 97.28  | $\rho(\text{C-H}_{\text{Ben}})$                                                                   |
|      | 1177 | 29.39  | $\rho(\text{N-H}) + \rho(\text{C-H}_{\text{CH}_3})$                                               |
| 1072 | 1169 | 21.90  | $\rho + \delta(\text{C-H}_{\text{Ben}})$                                                          |
| 998  | 1087 | 20.48  | $\rho(\text{C-H}_{\text{Py}}) + \rho(\text{C-H}_{\text{CH}_3})$                                   |
|      | 999  | 30.34  | $\delta_{as}(\text{C-H}_{\text{Ben}}) + \delta_s(\text{C-H}_{\text{Py}})$                         |
|      | 968  | 19.89  | $\rho(\text{C-H}_{\text{CH}_3}) + \rho(\text{N-H})$                                               |
|      | 919  | 6.79   | $\delta_s(\text{C-H}_{\text{Ben}})$                                                               |
| 833  | 885  | 21.85  | $\rho(\text{C-H}_{\text{CH}_3})$                                                                  |
|      | 836  | 35.03  | $\nu(\text{C=C-C=C}_{\text{Ben}}) + \rho(\text{N-H})$                                             |
| 789  | 819  | 81.40  | $\delta_s(\text{O-H})$                                                                            |
|      | 788  | 32.59  | $\delta_s(\text{O-H})$                                                                            |
| 750  | 766  | 21.77  | $\delta_s(\text{C-H}_{\text{CH}_3})$                                                              |
|      | 752  | 30.46  | $b(\text{N-H})$                                                                                   |
| 672  | 690  | 33.01  | $\nu(\text{C=C-C=C}_{\text{Ben}}) + \delta_{as}(\text{C-H}_{\text{CH}_3})$                        |
|      | 662  | 63.22  | $\delta_s(\text{N-H})$                                                                            |

|     |       |                                                                |
|-----|-------|----------------------------------------------------------------|
| 614 | 16.54 | $\delta_s$ (N-H)+ $\delta_s$ (C-H <sub>py</sub> )              |
| 593 | 11.39 | $\delta_s$ (C-H <sub>Ben</sub> )                               |
| 521 | 35.09 | $\delta_s$ (N-H <sub>py</sub> )                                |
| 499 | 7.04  | $\rho$ (O-H)+ $\rho$ (C-H <sub>Ben</sub> )                     |
| 451 | 22.62 | $\rho$ (O-H)+ $\delta_s$ (C-H <sub>Ben</sub> )                 |
| 409 | 24.02 | $\rho$ (C=O) + $\rho$ (C-H <sub>CH3</sub> )                    |
| 399 | 2.53  | $\rho$ (C-H <sub>CH3</sub> )+ $\rho$ (C=O)                     |
| 322 | 7.60  | $\rho$ (C-H <sub>CH3</sub> )+ $\rho$ (C-H <sub>Py</sub> )      |
| 289 | 0.80  | $\rho$ (C-H <sub>CH3</sub> )                                   |
| 211 | 4.25  | $\rho$ (C-H <sub>CH3</sub> )+ $\rho$ (O-H)                     |
| 148 | 1.70  | $\delta_s$ (C-H <sub>Ben</sub> )+ $\rho$ (C-H <sub>CH3</sub> ) |
| 147 | 3.42  | $\rho$ (C-H <sub>CH3</sub> )                                   |
| 101 | 0.40  | $\rho$ (C-H <sub>CH3</sub> )                                   |
| 69  | 0.55  | $\rho$ (C-H <sub>CH3</sub> )                                   |
| 31  | 0.51  | $\delta_s$ (C-H <sub>CH3</sub> )                               |

$\delta$  Scissoring ,  $\nu_s$  symmetric ,  $\nu_{as}$  asymmetric ,  $\rho$  rocking ,  $\delta_s$  symmetric bending vibration (wagging),  $\delta_{as}$  asymmetric bending vibration(twisting),  $\nu$  is stretching vibration, b is bending vibration, in compound. (Ben) is benzene. Intensity in (km/mol) and Frequency in  $\nu$ (cm<sup>-1</sup>).

**Table S9:** Natural bond orbital (NBO) analysis of **6a**

| Donor(i)                         | Type     | Acceptor(j)                      | Type       | E (2) <sup>a</sup> [kJ/mol] | E(j)-E(i) <sup>b</sup><br>[a.u.] | F(i,j) <sup>c</sup><br>[a.u.] |
|----------------------------------|----------|----------------------------------|------------|-----------------------------|----------------------------------|-------------------------------|
| O <sub>1</sub> -H <sub>2</sub>   | $\sigma$ | C <sub>10</sub> -C <sub>11</sub> | $\sigma^*$ | 6.07                        | 1.44                             | 0.084                         |
| N <sub>6</sub> -C <sub>28</sub>  | $\pi$    | C <sub>24</sub> -C <sub>29</sub> | $\pi^*$    | 43.15                       | 0.41                             | 0.119                         |
| N <sub>6</sub> -C <sub>28</sub>  | $\pi$    | C <sub>25</sub> -C <sub>27</sub> | $\pi^*$    | 14.04                       | 0.42                             | 0.068                         |
| C <sub>10</sub> -C <sub>18</sub> | $\pi$    | O <sub>3</sub> -C <sub>23</sub>  | $\pi^*$    | 31.62                       | 0.33                             | 0.096                         |
| C <sub>10</sub> -C <sub>18</sub> | $\pi$    | C <sub>11</sub> -C <sub>13</sub> | $\pi^*$    | 18.62                       | 0.36                             | 0.076                         |
| C <sub>10</sub> -C <sub>18</sub> | $\pi$    | C <sub>15</sub> -C <sub>16</sub> | $\pi^*$    | 30.00                       | 0.37                             | 0.096                         |
| C <sub>11</sub> -C <sub>13</sub> | $\pi$    | C <sub>10</sub> -C <sub>18</sub> | $\pi^*$    | 32.30                       | 0.34                             | 0.098                         |
| C <sub>11</sub> -C <sub>13</sub> | $\pi$    | C <sub>15</sub> -C <sub>16</sub> | $\pi^*$    | 21.28                       | 0.37                             | 0.081                         |
| C <sub>15</sub> -C <sub>16</sub> | $\pi$    | C <sub>10</sub> -C <sub>18</sub> | $\pi^*$    | 20.41                       | 0.34                             | 0.077                         |
| C <sub>15</sub> -C <sub>16</sub> | $\pi$    | C <sub>11</sub> -C <sub>13</sub> | $\pi^*$    | 29.57                       | 0.37                             | 0.093                         |
| C <sub>24</sub> -C <sub>29</sub> | $\pi$    | O <sub>3</sub> -C <sub>23</sub>  | $\pi^*$    | 16.01                       | 0.36                             | 0.071                         |
| C <sub>24</sub> -C <sub>29</sub> | $\pi$    | N <sub>6</sub> -C <sub>28</sub>  | $\pi^*$    | 20.26                       | 0.32                             | 0.073                         |
| C <sub>24</sub> -C <sub>29</sub> | $\pi$    | C <sub>25</sub> -C <sub>27</sub> | $\pi^*$    | 37.06                       | 0.36                             | 0.105                         |
| C <sub>25</sub> -C <sub>27</sub> | $\pi$    | O <sub>4</sub> -C <sub>31</sub>  | $\pi^*$    | 27.46                       | 0.37                             | 0.092                         |
| C <sub>25</sub> -C <sub>27</sub> | $\pi$    | N <sub>6</sub> -C <sub>28</sub>  | $\pi^*$    | 42.80                       | 0.33                             | 0.108                         |
| C <sub>29</sub> -H <sub>30</sub> | $\sigma$ | N <sub>6</sub> -C <sub>28</sub>  | $\sigma^*$ | 5.70                        | 1.19                             | 0.074                         |
| C <sub>13</sub> -C <sub>15</sub> | $\sigma$ | C <sub>12</sub> -C <sub>13</sub> | $\sigma^*$ | 4.68                        | 1.37                             | 0.072                         |
| LP-O <sub>1</sub>                | $\sigma$ | C <sub>10</sub> -C <sub>18</sub> | $\sigma^*$ | 9.12                        | 1.24                             | 0.095                         |
| LP-O <sub>1</sub>                | $\pi$    | C <sub>10</sub> -C <sub>18</sub> | $\pi^*$    | 48.09                       | 0.42                             | 0.135                         |
| LP-O <sub>3</sub>                | $\pi$    | O <sub>1</sub> -H <sub>2</sub>   | $\sigma^*$ | 5.80                        | 1.30                             | 0.078                         |
| LP-O <sub>3</sub>                | $\pi$    | C <sub>13</sub> -C <sub>15</sub> | $\sigma^*$ | 5.53                        | 1.30                             | 0.076                         |
| LP-O <sub>3</sub>                | $\pi$    | O <sub>1</sub> -H <sub>2</sub>   | $\sigma^*$ | 21.88                       | 0.92                             | 0.129                         |
| LP-O <sub>3</sub>                | $\pi$    | C <sub>18</sub> -C <sub>23</sub> | $\sigma^*$ | 13.13                       | 0.92                             | 0.100                         |
| LP-O <sub>3</sub>                | $\pi$    | C <sub>23</sub> -C <sub>24</sub> | $\sigma^*$ | 21.12                       | 0.88                             | 0.123                         |
| LP-O <sub>4</sub>                | $\pi$    | N <sub>7</sub> -C <sub>31</sub>  | $\sigma^*$ | 34.49                       | 0.81                             | 0.151                         |
| LP-O <sub>4</sub>                | $\pi$    | C <sub>27</sub> -C <sub>31</sub> | $\sigma^*$ | 24.00                       | 0.83                             | 0.128                         |
| LP-O <sub>5</sub>                | $\pi$    | N <sub>7</sub> -C <sub>32</sub>  | $\sigma^*$ | 31.82                       | 0.80                             | 0.145                         |
| LP-O <sub>5</sub>                | $\pi$    | N <sub>9</sub> -C <sub>32</sub>  | $\sigma^*$ | 33.26                       | 0.79                             | 0.147                         |
| LP-N <sub>6</sub>                | $\sigma$ | N <sub>9</sub> -C <sub>28</sub>  | $\sigma^*$ | 5.53                        | 0.93                             | 0.065                         |

|                                  |          |                                  |            |        |      |       |
|----------------------------------|----------|----------------------------------|------------|--------|------|-------|
| LP-N <sub>6</sub>                | $\sigma$ | C <sub>24</sub> -C <sub>29</sub> | $\sigma^*$ | 11.39  | 1.03 | 0.098 |
| LP-N <sub>6</sub>                | $\sigma$ | C <sub>27</sub> -C <sub>28</sub> | $\sigma^*$ | 12.21  | 1.01 | 0.100 |
| LP-N <sub>7</sub>                | $\sigma$ | O <sub>4</sub> -C <sub>31</sub>  | $\pi^*$    | 65.27  | 0.38 | 0.143 |
| LP-N <sub>7</sub>                | $\sigma$ | O <sub>5</sub> -C <sub>32</sub>  | $\pi^*$    | 68.70  | 0.36 | 0.141 |
| LP-N <sub>9</sub>                | $\sigma$ | O <sub>5</sub> -C <sub>32</sub>  | $\pi^*$    | 70.39  | 0.36 | 0.142 |
| LP-N <sub>9</sub>                | $\sigma$ | N <sub>6</sub> -C <sub>28</sub>  | $\pi^*$    | 64.20  | 0.33 | 0.133 |
| N <sub>6</sub> -C <sub>28</sub>  | $\pi$    | C <sub>24</sub> -C <sub>29</sub> | $\pi^*$    | 165.36 | 0.03 | 0.096 |
| N <sub>6</sub> -C <sub>28</sub>  | $\pi$    | C <sub>25</sub> -C <sub>27</sub> | $\pi^*$    | 120.98 | 0.04 | 0.095 |
| C <sub>10</sub> -C <sub>18</sub> | $\pi$    | C <sub>11</sub> -C <sub>13</sub> | $\pi^*$    | 167.00 | 0.02 | 0.096 |
| C <sub>10</sub> -C <sub>18</sub> | $\pi$    | C <sub>15</sub> -C <sub>16</sub> | $\pi^*$    | 134.44 | 0.03 | 0.088 |

**Table S10:** Natural bond orbital (NBO) analysis of **6b**

| Donor(i)                          | Type     | Acceptor(j)                       | Type       | E (2) <sup>a</sup> [kJ/mol] | E(j)-E(i) <sup>b</sup> [a.u.] | F(i,j) <sup>c</sup> [a.u.] |
|-----------------------------------|----------|-----------------------------------|------------|-----------------------------|-------------------------------|----------------------------|
| O <sub>5</sub> - C <sub>33</sub>  | $\sigma$ | C <sub>24</sub> - C <sub>33</sub> | $\sigma^*$ | 65.09                       | 4.11                          | 0.469                      |
| O <sub>5</sub> - C <sub>33</sub>  | $\sigma$ | C <sub>28</sub> - H <sub>30</sub> | $\sigma^*$ | 21.55                       | 4.07                          | 0.265                      |
| N <sub>7</sub> - C <sub>26</sub>  | $\pi$    | C <sub>21</sub> - C <sub>22</sub> | $\pi^*$    | 9.53                        | 0.34                          | 0.051                      |
| N <sub>7</sub> - C <sub>26</sub>  | $\pi$    | C <sub>24</sub> - C <sub>25</sub> | $\pi^*$    | 29.05                       | 0.32                          | 0.090                      |
| N <sub>9</sub> - H <sub>10</sub>  | $\sigma$ | C <sub>24</sub> - C <sub>33</sub> | $\sigma^*$ | 15.93                       | 3.72                          | 0.220                      |
| N <sub>9</sub> - H <sub>10</sub>  | $\sigma$ | C <sub>28</sub> - H <sub>30</sub> | $\sigma^*$ | 12.09                       | 3.69                          | 0.189                      |
| N <sub>9</sub> - C <sub>32</sub>  | $\sigma$ | C <sub>28</sub> - H <sub>30</sub> | $\sigma^*$ | 13.09                       | 3.85                          | 0.201                      |
| N <sub>9</sub> - C <sub>33</sub>  | $\sigma$ | C <sub>28</sub> - H <sub>30</sub> | $\sigma^*$ | 58.20                       | 3.84                          | 0.422                      |
| C <sub>11</sub> - C <sub>19</sub> | $\pi$    | O <sub>4</sub> - C <sub>20</sub>  | $\pi^*$    | 25.60                       | 0.25                          | 0.075                      |
| C <sub>11</sub> - C <sub>19</sub> | $\pi$    | C <sub>12</sub> - C <sub>14</sub> | $\pi^*$    | 14.59                       | 0.29                          | 0.059                      |
| C <sub>11</sub> - C <sub>19</sub> | $\pi$    | C <sub>16</sub> - C <sub>17</sub> | $\pi^*$    | 22.31                       | 0.28                          | 0.072                      |
| C <sub>12</sub> - C <sub>14</sub> | $\pi$    | C <sub>11</sub> - C <sub>19</sub> | $\pi^*$    | 22.39                       | 0.28                          | 0.073                      |
| C <sub>12</sub> - C <sub>14</sub> | $\pi$    | C <sub>16</sub> - C <sub>17</sub> | $\pi^*$    | 18.22                       | 0.28                          | 0.065                      |
| C <sub>16</sub> - C <sub>17</sub> | $\pi$    | C <sub>11</sub> - C <sub>19</sub> | $\pi^*$    | 14.86                       | 0.29                          | 0.061                      |
| C <sub>16</sub> - C <sub>17</sub> | $\pi$    | C <sub>12</sub> - C <sub>14</sub> | $\pi^*$    | 20.42                       | 0.30                          | 0.070                      |
| C <sub>21</sub> - C <sub>22</sub> | $\pi$    | O <sub>4</sub> - C <sub>20</sub>  | $\pi^*$    | 14.75                       | 0.27                          | 0.058                      |
| C <sub>21</sub> - C <sub>22</sub> | $\pi$    | N <sub>7</sub> - C <sub>26</sub>  | $\pi^*$    | 30.31                       | 0.27                          | 0.081                      |
| C <sub>21</sub> - C <sub>22</sub> | $\pi$    | C <sub>24</sub> - C <sub>25</sub> | $\pi^*$    | 15.19                       | 0.28                          | 0.059                      |
| C <sub>24</sub> - C <sub>25</sub> | $\pi$    | O <sub>5</sub> - C <sub>33</sub>  | $\pi^*$    | 24.56                       | 0.29                          | 0.078                      |
| C <sub>24</sub> - C <sub>25</sub> | $\pi$    | N <sub>7</sub> - C <sub>26</sub>  | $\pi^*$    | 12.58                       | 0.28                          | 0.054                      |
| C <sub>24</sub> - C <sub>25</sub> | $\pi$    | C <sub>21</sub> - C <sub>22</sub> | $\pi^*$    | 25.56                       | 0.30                          | 0.080                      |
| LP-F <sub>1</sub>                 | $\pi$    | C <sub>14</sub> - C <sub>16</sub> | $\sigma^*$ | 6.06                        | 0.96                          | 0.068                      |
| LP-F <sub>1</sub>                 | $\pi$    | C <sub>16</sub> - C <sub>17</sub> | $\sigma^*$ | 5.88                        | 0.99                          | 0.068                      |
| LP-F <sub>1</sub>                 | $\pi$    | C <sub>16</sub> - C <sub>17</sub> | $\pi^*$    | 17.63                       | 0.43                          | 0.083                      |
| LP-O <sub>2</sub>                 | $\pi$    | C <sub>11</sub> - C <sub>19</sub> | $\pi^*$    | 37.71                       | 0.32                          | 0.105                      |
| LP-O <sub>4</sub>                 | $\pi$    | C <sub>19</sub> - C <sub>20</sub> | $\sigma^*$ | 11.23                       | 0.78                          | 0.085                      |
| LP-O <sub>4</sub>                 | $\pi$    | C <sub>20</sub> - C <sub>21</sub> | $\sigma^*$ | 18.11                       | 0.71                          | 0.103                      |
| LP-O <sub>5</sub>                 | $\sigma$ | C <sub>24</sub> - C <sub>33</sub> | $\sigma^*$ | 40.60                       | 3.72                          | 0.351                      |
| LP-O <sub>5</sub>                 | $\sigma$ | C <sub>28</sub> - H <sub>30</sub> | $\sigma^*$ | 15.52                       | 3.69                          | 0.214                      |
| LP-O <sub>5</sub>                 | $\pi$    | N <sub>9</sub> - C <sub>33</sub>  | $\sigma^*$ | 33.40                       | 0.67                          | 0.136                      |
| LP-O <sub>5</sub>                 | $\pi$    | C <sub>24</sub> - C <sub>33</sub> | $\sigma^*$ | 16.66                       | 3.31                          | 0.214                      |
| LP-O <sub>5</sub>                 | $\pi$    | C <sub>28</sub> - H <sub>30</sub> | $\sigma^*$ | 26.19                       | 3.28                          | 0.271                      |
| LP-O <sub>6</sub>                 | $\pi$    | N <sub>8</sub> - C <sub>32</sub>  | $\sigma^*$ | 26.30                       | 0.65                          | 0.119                      |
| LP-O <sub>6</sub>                 | $\pi$    | N <sub>9</sub> - C <sub>32</sub>  | $\sigma^*$ | 25.66                       | 0.66                          | 0.119                      |
| LP-N <sub>7</sub>                 | $\sigma$ | C <sub>21</sub> - C <sub>26</sub> | $\sigma^*$ | 11.48                       | 0.89                          | 0.092                      |
| LP-N <sub>7</sub>                 | $\sigma$ | C <sub>24</sub> - C <sub>25</sub> | $\sigma^*$ | 9.61                        | 0.86                          | 0.082                      |
| LP-N <sub>7</sub>                 | $\sigma$ | C <sub>24</sub> - C <sub>33</sub> | $\sigma^*$ | 6.82                        | 3.39                          | 0.137                      |
| LP-N <sub>7</sub>                 | $\sigma$ | C <sub>28</sub> - H <sub>30</sub> | $\sigma^*$ | 11.10                       | 3.35                          | 0.176                      |

|                                  |          |                                  |         |        |      |       |
|----------------------------------|----------|----------------------------------|---------|--------|------|-------|
| LP-N <sub>8</sub>                | $\sigma$ | C <sub>24</sub> -C <sub>25</sub> | $\pi^*$ | 47.19  | 0.28 | 0.103 |
| LP-N <sub>9</sub>                | $\sigma$ | O <sub>5</sub> -C <sub>33</sub>  | $\pi^*$ | 51.05  | 0.28 | 0.109 |
| O <sub>4</sub> -C <sub>20</sub>  | $\pi^*$  | C <sub>11</sub> -C <sub>19</sub> | $\pi^*$ | 113.58 | 0.02 | 0.071 |
| N <sub>7</sub> -C <sub>26</sub>  | $\pi^*$  | C <sub>21</sub> -C <sub>22</sub> | $\pi^*$ | 135.27 | 0.02 | 0.084 |
| C <sub>11</sub> -C <sub>19</sub> | $\pi^*$  | C <sub>12</sub> -C <sub>14</sub> | $\pi^*$ | 260.90 | 0.01 | 0.083 |
| C <sub>24</sub> -C <sub>25</sub> | $\pi^*$  | C <sub>21</sub> -C <sub>22</sub> | $\pi^*$ | 249.85 | 0.01 | 0.086 |

**Table S11:** Natural bond orbital (NBO) analysis of **6c**

| Donor(i)                         | Type     | Acceptor(j)                      | Type       | E (2) <sup>a</sup> [kJ/mol] | E(j)-E(i) <sup>b</sup><br>[a.u.] | F(i,j) <sup>c</sup><br>[a.u.] |
|----------------------------------|----------|----------------------------------|------------|-----------------------------|----------------------------------|-------------------------------|
| N <sub>6</sub> -C <sub>30</sub>  | $\pi$    | C <sub>27</sub> -C <sub>28</sub> | $\pi^*$    | 30.14                       | 0.33                             | 0.090                         |
| N <sub>6</sub> -C <sub>30</sub>  | $\pi$    | C <sub>31</sub> -C <sub>32</sub> | $\pi^*$    | 9.83                        | 0.34                             | 0.051                         |
| N <sub>9</sub> -C <sub>36</sub>  | $\sigma$ | C <sub>15</sub> -C <sub>16</sub> | $\pi^*$    | 5.18                        | 0.94                             | 0.067                         |
| N <sub>9</sub> -C <sub>36</sub>  | $\sigma$ | C <sub>19</sub> -H <sub>20</sub> | $\sigma^*$ | 9.92                        | 1.57                             | 0.112                         |
| N <sub>9</sub> -C <sub>36</sub>  | $\sigma$ | C <sub>36</sub> -H <sub>39</sub> | $\sigma^*$ | 25.55                       | 6.12                             | 0.353                         |
| C <sub>11</sub> -C <sub>13</sub> | $\pi$    | C <sub>15</sub> -C <sub>16</sub> | $\pi^*$    | 10.84                       | 0.45                             | 0.063                         |
| C <sub>15</sub> -C <sub>16</sub> | $\pi$    | C <sub>11</sub> -C <sub>13</sub> | $\pi^*$    | 20.76                       | 0.29                             | 0.070                         |
| C <sub>27</sub> -C <sub>28</sub> | $\pi$    | O <sub>3</sub> -C <sub>26</sub>  | $\pi^*$    | 14.28                       | 0.27                             | 0.058                         |
| C <sub>27</sub> -C <sub>28</sub> | $\pi$    | N <sub>6</sub> -C <sub>30</sub>  | $\pi^*$    | 14.22                       | 0.25                             | 0.054                         |
| C <sub>27</sub> -C <sub>28</sub> | $\pi$    | C <sub>31</sub> -C <sub>32</sub> | $\pi^*$    | 26.15                       | 0.29                             | 0.079                         |
| C <sub>31</sub> -C <sub>32</sub> | $\pi$    | O <sub>4</sub> -C <sub>34</sub>  | $\pi^*$    | 23.69                       | 0.28                             | 0.074                         |
| C <sub>31</sub> -C <sub>32</sub> | $\pi$    | N <sub>6</sub> -C <sub>30</sub>  | $\pi^*$    | 33.01                       | 0.26                             | 0.084                         |
| C <sub>31</sub> -C <sub>32</sub> | $\pi$    | C <sub>27</sub> -C <sub>28</sub> | $\pi^*$    | 14.23                       | 0.28                             | 0.057                         |
| C <sub>36</sub> -H <sub>37</sub> | $\sigma$ | C <sub>36</sub> -H <sub>39</sub> | $\sigma^*$ | 16.75                       | 5.90                             | 0.281                         |
| C <sub>36</sub> -H <sub>38</sub> | $\sigma$ | C <sub>36</sub> -H <sub>39</sub> | $\sigma^*$ | 10.19                       | 5.90                             | 0.219                         |
| C <sub>36</sub> -H <sub>39</sub> | $\sigma$ | C <sub>36</sub> -H <sub>39</sub> | $\sigma^*$ | 53.30                       | 5.89                             | 0.500                         |
| LP-O <sub>1</sub>                | $\sigma$ | C <sub>10</sub> -C <sub>18</sub> | $\sigma^*$ | 6.91                        | 1.11                             | 0.078                         |
| LP-O <sub>1</sub>                | $\pi$    | C10 LP                           | $\sigma^*$ | 69.67                       | 0.19                             | 0.128                         |
| LP-O <sub>3</sub>                | $\pi$    | O <sub>1</sub> -H <sub>2</sub>   | $\sigma^*$ | 17.30                       | 0.72                             | 0.102                         |
| LP-O <sub>3</sub>                | $\pi$    | C <sub>18</sub> -C <sub>26</sub> | $\sigma^*$ | 11.93                       | 0.77                             | 0.087                         |
| LP-O <sub>3</sub>                | $\pi$    | C <sub>26</sub> -C <sub>27</sub> | $\sigma^*$ | 17.69                       | 0.73                             | 0.103                         |
| LP-O <sub>4</sub>                | $\pi$    | N <sub>7</sub> -C <sub>34</sub>  | $\sigma^*$ | 27.75                       | 0.68                             | 0.124                         |
| LP-O <sub>4</sub>                | $\pi$    | C <sub>31</sub> -C <sub>34</sub> | $\sigma^*$ | 18.45                       | 0.71                             | 0.104                         |
| LP-O <sub>5</sub>                | $\pi$    | N <sub>7</sub> -C <sub>35</sub>  | $\sigma^*$ | 25.49                       | 0.66                             | 0.118                         |
| LP-O <sub>5</sub>                | $\pi$    | N <sub>9</sub> -C <sub>35</sub>  | $\sigma^*$ | 26.18                       | 0.66                             | 0.119                         |
| LP-N <sub>6</sub>                | $\pi$    | N <sub>9</sub> -C <sub>30</sub>  | $\sigma^*$ | 5.48                        | 0.78                             | 0.059                         |
| LP-N <sub>6</sub>                | $\sigma$ | C <sub>27</sub> -C <sub>28</sub> | $\sigma^*$ | 8.92                        | 0.90                             | 0.081                         |
| LP-N <sub>6</sub>                | $\sigma$ | C <sub>30</sub> -C <sub>31</sub> | $\sigma^*$ | 9.77                        | 0.88                             | 0.084                         |
| LP-N <sub>7</sub>                | $\sigma$ | O <sub>4</sub> -C <sub>34</sub>  | $\pi^*$    | 51.60                       | 0.29                             | 0.111                         |
| LP-N <sub>7</sub>                | $\sigma$ | O <sub>5</sub> -C <sub>35</sub>  | $\pi^*$    | 54.94                       | 0.28                             | 0.111                         |
| LP-N <sub>9</sub>                | $\sigma$ | O <sub>5</sub> -C <sub>35</sub>  | $\pi^*$    | 55.52                       | 0.27                             | 0.111                         |
| LP-N <sub>9</sub>                | $\sigma$ | N <sub>6</sub> -C <sub>30</sub>  | $\pi^*$    | 52.49                       | 0.26                             | 0.106                         |
| LP-C <sub>10</sub>               | $\sigma$ | C <sub>11</sub> -C <sub>13</sub> | $\pi^*$    | 48.29                       | 0.16                             | 0.101                         |
| LP-C <sub>18</sub>               | $\pi$    | O <sub>3</sub> -C <sub>26</sub>  | $\pi^*$    | 78.19                       | 0.12                             | 0.104                         |
| LP-C <sub>18</sub>               | $\pi$    | C <sub>15</sub> -C <sub>16</sub> | $\pi^*$    | 30.44                       | 0.32                             | 0.105                         |
| N <sub>6</sub> -C <sub>30</sub>  | $\pi^*$  | C <sub>27</sub> -C <sub>28</sub> | $\pi^*$    | 113.08                      | 0.03                             | 0.079                         |
| N <sub>6</sub> -C <sub>30</sub>  | $\pi^*$  | C <sub>31</sub> -C <sub>32</sub> | $\pi^*$    | 100.04                      | 0.03                             | 0.083                         |
| C <sub>11</sub> -C <sub>13</sub> | $\pi^*$  | C <sub>15</sub> -C <sub>16</sub> | $\pi^*$    | 28.64                       | 0.16                             | 0.111                         |
| C <sub>15</sub> -C <sub>16</sub> | $\pi^*$  | C <sub>16</sub> -H <sub>17</sub> | $\sigma^*$ | 11.03                       | 0.37                             | 0.143                         |



|                                  |         |                                  |            |       |      |       |
|----------------------------------|---------|----------------------------------|------------|-------|------|-------|
| C <sub>15</sub> -C <sub>16</sub> | $\pi^*$ | C <sub>18</sub> -C <sub>26</sub> | $\sigma^*$ | 0.51  | 0.26 | 0.025 |
| C <sub>15</sub> -C <sub>16</sub> | $\pi^*$ | C <sub>19</sub> -H <sub>20</sub> | $\sigma^*$ | 17.78 | 0.63 | 0.238 |
| C <sub>15</sub> -C <sub>16</sub> | $\pi^*$ | C <sub>36</sub> -H <sub>37</sub> | $\sigma^*$ | 5.95  | 0.24 | 0.086 |
| C <sub>15</sub> -C <sub>16</sub> | $\pi^*$ | C <sub>36</sub> -H <sub>38</sub> | $\sigma^*$ | 5.84  | 0.26 | 0.089 |
| C <sub>15</sub> -C <sub>16</sub> | $\pi^*$ | C <sub>36</sub> -H <sub>39</sub> | $\sigma^*$ | 30.04 | 5.18 | 0.890 |

**Table S12:** Natural bond orbital (NBO) analysis of **6d**

| Donor(i)                         | Type     | Acceptor(j)                      | Type       | E (2) <sup>a</sup> [kJ/mol] | E(j)-E(i) <sup>b</sup><br>[a.u.] | F(i,j) <sup>c</sup><br>[a.u.] |
|----------------------------------|----------|----------------------------------|------------|-----------------------------|----------------------------------|-------------------------------|
| N <sub>61</sub> -C <sub>35</sub> | $\pi$    | C <sub>33</sub> -C <sub>34</sub> | $\pi^*$    | 29.69                       | 0.32                             | 0.090                         |
| N <sub>9</sub> -C <sub>39</sub>  | $\sigma$ | C <sub>39</sub> -H <sub>42</sub> | $\sigma^*$ | 24.55                       | 6.07                             | 0.345                         |
| C <sub>10</sub> -C <sub>11</sub> | $\pi$    | O <sub>3</sub> -C <sub>29</sub>  | $\pi^*$    | 26.96                       | 0.25                             | 0.076                         |
| C <sub>10</sub> -C <sub>11</sub> | $\pi$    | C <sub>12</sub> -C <sub>14</sub> | $\pi^*$    | 13.38                       | 0.29                             | 0.057                         |
| C <sub>10</sub> -C <sub>11</sub> | $\pi$    | C <sub>16</sub> -C <sub>17</sub> | $\pi^*$    | 17.65                       | 0.36                             | 0.073                         |
| C <sub>12</sub> -C <sub>14</sub> | $\pi$    | C <sub>10</sub> -C <sub>11</sub> | $\pi^*$    | 23.77                       | 0.27                             | 0.074                         |
| C <sub>12</sub> -C <sub>14</sub> | $\pi$    | C <sub>16</sub> -C <sub>17</sub> | $\pi^*$    | 13.80                       | 0.36                             | 0.063                         |
| C <sub>16</sub> -C <sub>17</sub> | $\pi$    | C <sub>10</sub> -C <sub>11</sub> | $\pi^*$    | 15.57                       | 0.27                             | 0.060                         |
| C <sub>16</sub> -C <sub>17</sub> | $\pi$    | C <sub>12</sub> -C <sub>14</sub> | $\pi^*$    | 21.01                       | 0.29                             | 0.070                         |
| C <sub>30</sub> -C <sub>31</sub> | $\pi$    | O <sub>3</sub> -C <sub>29</sub>  | $\pi^*$    | 14.37                       | 0.27                             | 0.058                         |
| C <sub>30</sub> -C <sub>31</sub> | $\pi$    | N <sub>6</sub> -C <sub>35</sub>  | $\pi^*$    | 30.65                       | 0.27                             | 0.082                         |
| C <sub>30</sub> -C <sub>31</sub> | $\pi$    | C <sub>33</sub> -C <sub>34</sub> | $\pi^*$    | 15.82                       | 0.27                             | 0.059                         |
| C <sub>33</sub> -C <sub>34</sub> | $\pi$    | O <sub>4</sub> -C <sub>37</sub>  | $\pi^*$    | 23.48                       | 0.29                             | 0.076                         |
| C <sub>33</sub> -C <sub>34</sub> | $\pi$    | N <sub>6</sub> -C <sub>35</sub>  | $\pi^*$    | 12.18                       | 0.28                             | 0.053                         |
| C <sub>33</sub> -C <sub>34</sub> | $\pi$    | C <sub>30</sub> -C <sub>31</sub> | $\pi^*$    | 25.04                       | 0.30                             | 0.079                         |
| C <sub>39</sub> -H <sub>40</sub> | $\sigma$ | C <sub>39</sub> -H <sub>42</sub> | $\sigma^*$ | 17.37                       | 5.85                             | 0.285                         |
| C <sub>39</sub> -H <sub>42</sub> | $\sigma$ | C <sub>19</sub> -H <sub>20</sub> | $\sigma^*$ | 15.60                       | 1.18                             | 0.121                         |
| C <sub>39</sub> -H <sub>42</sub> | $\sigma$ | C <sub>21</sub> -H <sub>22</sub> | $\sigma^*$ | 20.74                       | 1.31                             | 0.147                         |
| C <sub>39</sub> -H <sub>42</sub> | $\sigma$ | C <sub>39</sub> -H <sub>42</sub> | $\sigma^*$ | 51.83                       | 5.84                             | 0.491                         |
| LP-O <sub>1</sub>                | $\pi$    | C <sub>10</sub> -C <sub>11</sub> | $\pi^*$    | 37.59                       | 0.33                             | 0.106                         |
| LP-O <sub>3</sub>                | $\pi$    | C <sub>10</sub> -C <sub>29</sub> | $\sigma^*$ | 11.76                       | 0.77                             | 0.087                         |

|                                  |          |                                  |            |        |      |       |
|----------------------------------|----------|----------------------------------|------------|--------|------|-------|
| LP-O <sub>3</sub>                | $\pi$    | C <sub>29</sub> -C <sub>30</sub> | $\sigma^*$ | 17.05  | 0.75 | 0.103 |
| LP-O <sub>4</sub>                | $\pi$    | N <sub>7</sub> -C <sub>37</sub>  | $\sigma^*$ | 27.70  | 0.67 | 0.124 |
| LP-O <sub>4</sub>                | $\pi$    | C <sub>33</sub> -C <sub>37</sub> | $\sigma^*$ | 17.97  | 0.71 | 0.103 |
| LP-O <sub>5</sub>                | $\pi$    | N <sub>7</sub> -C <sub>38</sub>  | $\sigma^*$ | 25.57  | 0.66 | 0.118 |
| LP-O <sub>5</sub>                | $\pi$    | N <sub>9</sub> -C <sub>38</sub>  | $\sigma^*$ | 26.12  | 0.66 | 0.119 |
| LP-N <sub>6</sub>                | $\sigma$ | C <sub>30</sub> -C <sub>35</sub> | $\sigma^*$ | 8.79   | 0.89 | 0.08  |
| LP-N <sub>6</sub>                | $\sigma$ | C <sub>33</sub> -C <sub>34</sub> | $\sigma^*$ | 10.04  | 0.89 | 0.086 |
| LP-N <sub>7</sub>                | $\sigma$ | O <sub>4</sub> -C <sub>37</sub>  | $\pi^*$    | 52.43  | 0.29 | 0.111 |
| LP-N <sub>9</sub>                | $\sigma$ | C <sub>33</sub> -C <sub>34</sub> | $\pi^*$    | 47.08  | 0.27 | 0.103 |
| LP-N <sub>9</sub>                | $\sigma$ | C <sub>39</sub> -C <sub>40</sub> | $\sigma^*$ | 5.06   | 0.77 | 0.062 |
| O <sub>3</sub> -C <sub>29</sub>  | $\pi$    | C <sub>10</sub> -C <sub>11</sub> | $\pi^*$    | 99.51  | 0.02 | 0.072 |
| O <sub>3</sub> -C <sub>29</sub>  | $\pi$    | C <sub>30</sub> -C <sub>31</sub> | $\pi^*$    | 76.04  | 0.01 | 0.056 |
| N <sub>6</sub> -C <sub>35</sub>  | $\pi$    | C <sub>30</sub> -C <sub>31</sub> | $\pi^*$    | 145.81 | 0.02 | 0.084 |
| C <sub>10</sub> -C <sub>11</sub> | $\pi$    | C <sub>12</sub> -C <sub>14</sub> | $\pi^*$    | 170.92 | 0.02 | 0.083 |
| C <sub>10</sub> -C <sub>11</sub> | $\pi$    | C <sub>16</sub> -C <sub>17</sub> | $\pi^*$    | 31.26  | 0.09 | 0.077 |
| C <sub>12</sub> -C <sub>14</sub> | $\pi$    | C <sub>16</sub> -C <sub>17</sub> | $\pi^*$    | 34.29  | 0.07 | 0.080 |
| C <sub>16</sub> -C <sub>17</sub> | $\pi$    | C <sub>19</sub> -H <sub>20</sub> | $\sigma^*$ | 5.65   | 0.56 | 0.126 |
| C <sub>16</sub> -C <sub>17</sub> | $\pi$    | C <sub>21</sub> -H <sub>22</sub> | $\sigma^*$ | 5.79   | 0.69 | 0.145 |
| C <sub>16</sub> -C <sub>17</sub> | $\pi$    | C <sub>39</sub> -H <sub>42</sub> | $\sigma^*$ | 10.90  | 5.22 | 0.545 |
| C <sub>33</sub> -C <sub>34</sub> | $\pi$    | C <sub>30</sub> -C <sub>31</sub> | $\pi^*$    | 183.60 | 0.02 | 0.081 |

**Table S13:** TD-DFT analysis of FMOs

| Com.      | No | DFT $\lambda$ (nm) | E (cm <sup>-1</sup> ) | <i>f</i> | MO contributions                                   |
|-----------|----|--------------------|-----------------------|----------|----------------------------------------------------|
| <b>6a</b> | 1  | 364.466438392      | 27437.3685657         | 0.1403   | H→L (97%)                                          |
|           | 2  | 342.545083609      | 29193.2375577         | 0.0017   | H→L (99%)                                          |
|           | 3  | 327.627812309      | 30522.4392566         | 0.013    | H-4→L (27%), H-3→L (29%), H-2→L (15%), H-1→L (23%) |
| <b>6b</b> | 4  | 364.466438392      | 27437.3685657         | 0.1403   | H→L (97%)                                          |
|           | 5  | 342.545083609      | 29193.2375577         | 0.0017   | H→L +1(99%)                                        |
|           | 6  | 327.627812309      | 30522.4392566         | 0.013    | H-4→L (27%), H-3→L (29%), H-2→L (15%), H-          |

|           |    |               |               |        |                                                    |
|-----------|----|---------------|---------------|--------|----------------------------------------------------|
|           |    |               |               |        | 1→L (23%)                                          |
| <b>6c</b> | 7  | 365.670362214 | 27347.0344697 | 0.1357 | H→L (97%)                                          |
|           | 8  | 342.990464237 | 29155.3294995 | 0.0018 | H→L +1(99%)                                        |
|           | 9  | 327.749062921 | 30511.1474946 | 0.0131 | H-4→L (26%), H-3→L (33%), H-2→L (13%), H-1→L (22%) |
| <b>6d</b> | 10 | 368.200614772 | 27159.1072877 | 0.1197 | H→L (96%)                                          |
|           | 11 | 350.277412737 | 28548.8005689 | 0.0021 | H→L+1 (98%)                                        |
|           | 12 | 327.394225012 | 30544.2162262 | 0.0196 | H-4→L (20%), H-3→L (38%), H-1→L (28%), H-2→L (8%)  |

Com. = compound MO=molecular orbital, H=HOMO, L=LUMO,  $f$ = oscillator strength

**Table S13:** UV-Vis experimental data in different solvents of **6a-d**

| Solvent            | <b>6a</b>        |            | <b>6c</b>        |            |
|--------------------|------------------|------------|------------------|------------|
|                    | $\lambda_{\max}$ | Absorbance | $\lambda_{\max}$ | Absorbance |
| <b>1,4-dioxane</b> | 300              | 2.5850     | 305              | 2.3565     |
| <b>Acetone</b>     | 332              | 1.4814     | 332              | 1.5702     |
| <b>DMSO</b>        | 305              | 2.3979     | 311              | 2.1135     |
| Solvent            | <b>6b</b>        |            | <b>6d</b>        |            |
|                    | $\lambda_{\max}$ | Absorbance | $\lambda_{\max}$ | Absorbance |
| <b>1,4-dioxane</b> | 373              | 2.0000     | 372              | 1.9281     |
| <b>Acetone</b>     | 377              | 2.5086     | 365              | 1.8297     |
| <b>DMSO</b>        | 300              | 1.8477     | 313              | 1.8827     |

**Table S15.** Dipole polarizability and major contributing tensor (au) of the studied **6a-d**

| Polarizability   | Compounds |           |           |           |
|------------------|-----------|-----------|-----------|-----------|
|                  | <b>6a</b> | <b>6b</b> | <b>6c</b> | <b>6d</b> |
| $\alpha_{xx}$    | 346       | 331       | 355       | 355       |
| $\alpha_{yy}$    | 230       | 213       | 241       | 263       |
| $\alpha_{zz}$    | 137       | 126       | 156       | 166       |
| $\alpha_{total}$ | 238       | 223       | 251       | 261       |

**Table S16:** Computed first hyperpolarizabilities ( $\beta_{tot}$ ) and major contributing tensor (au) of the studied **6a-d**

| Polarizability | Compounds |           |           |           |
|----------------|-----------|-----------|-----------|-----------|
|                | <b>6a</b> | <b>6b</b> | <b>6c</b> | <b>6d</b> |
| $\beta_{xxx}$  | 836       | 1777      | 646       | 1180      |
| $\beta_{xxy}$  | -1070     | -461      | -1089     | -801      |
| $\beta_{xyy}$  | -33       | -372      | 144       | -162      |
| $\beta_{yyy}$  | 194       | 66        | 282       | 350       |
| $\beta_{xxz}$  | 93        | -207      | 253       | -139      |
| $\beta_{yyz}$  | 24        | -66       | 33        | -43       |
| $\beta_{xzz}$  | -14       | -11       | -27       | 2         |
| $\beta_{yzz}$  | 55        | -0.43     | 63        | 69        |
| $\beta_{zzz}$  | 2         | 35        | -1.35     | 66        |

|                 |          |          |          |          |
|-----------------|----------|----------|----------|----------|
| $\beta_{total}$ | 1144.868 | 1468.416 | 1103.055 | 1095.345 |
|-----------------|----------|----------|----------|----------|

**Table S17.** X-ray crystallographic data of **6a-d**

| Crystal data          | <b>6a</b>                                                                          | <b>6b</b>                                        | <b>6c</b>                                        | <b>6d</b>                                        |
|-----------------------|------------------------------------------------------------------------------------|--------------------------------------------------|--------------------------------------------------|--------------------------------------------------|
| Diffractometer        | Bruker Kappa<br>APEXII CCD                                                         | Bruker Kappa<br>APEXII CCD                       | Bruker Kappa<br>APEXII CCD                       | Bruker Kappa<br>APEXII CCD                       |
| Absorption correction | Multi-scan<br>( <i>SADABS</i> ; Bruker,<br>2005)                                   | Multi-scan<br>( <i>SADABS</i> ; Bruker,<br>2005) | Multi-scan<br>( <i>SADABS</i> ; Bruker,<br>2005) | Multi-scan<br>( <i>SADABS</i> ; Bruker,<br>2005) |
| <b>Refinement</b>     |                                                                                    |                                                  |                                                  |                                                  |
| H-atom treatment      | H atoms treated by<br>a mixture of<br>independent and<br>constrained<br>refinement | H-atom parameters<br>constrained                 | H-atom parameters<br>constrained                 | H-atom parameters<br>constrained                 |

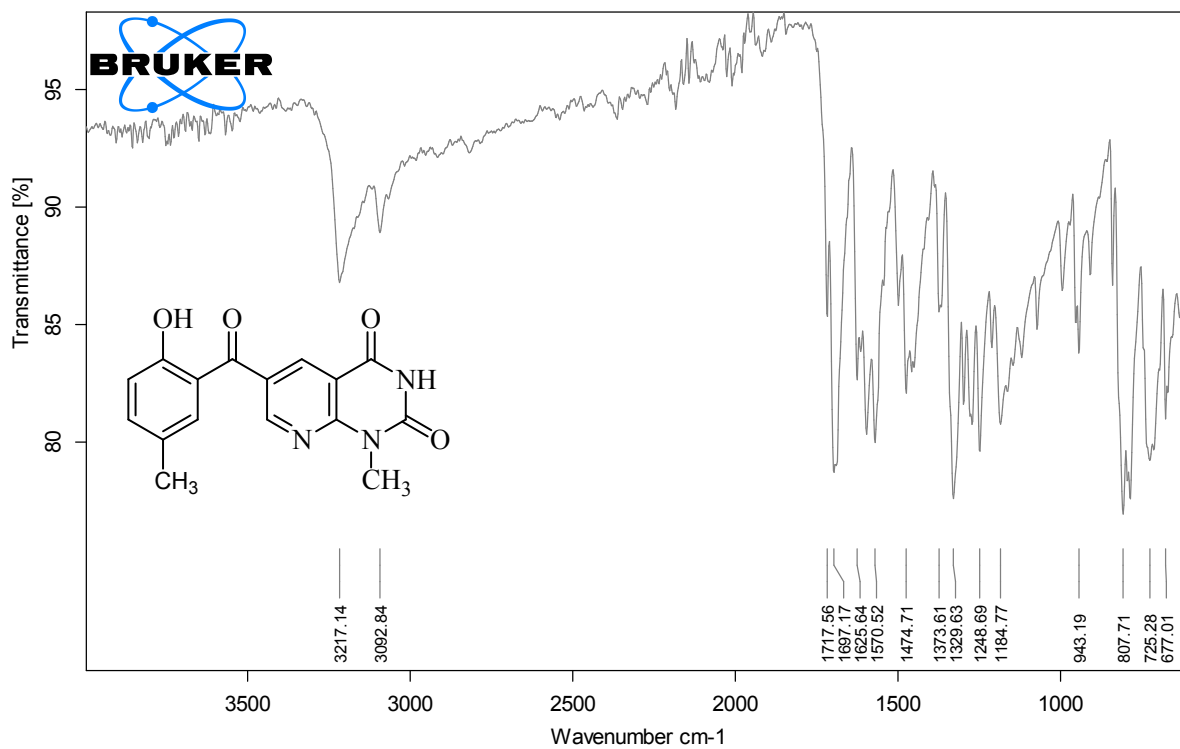

**Figure S1:** Experimental FT-IR spectrum of **6a**

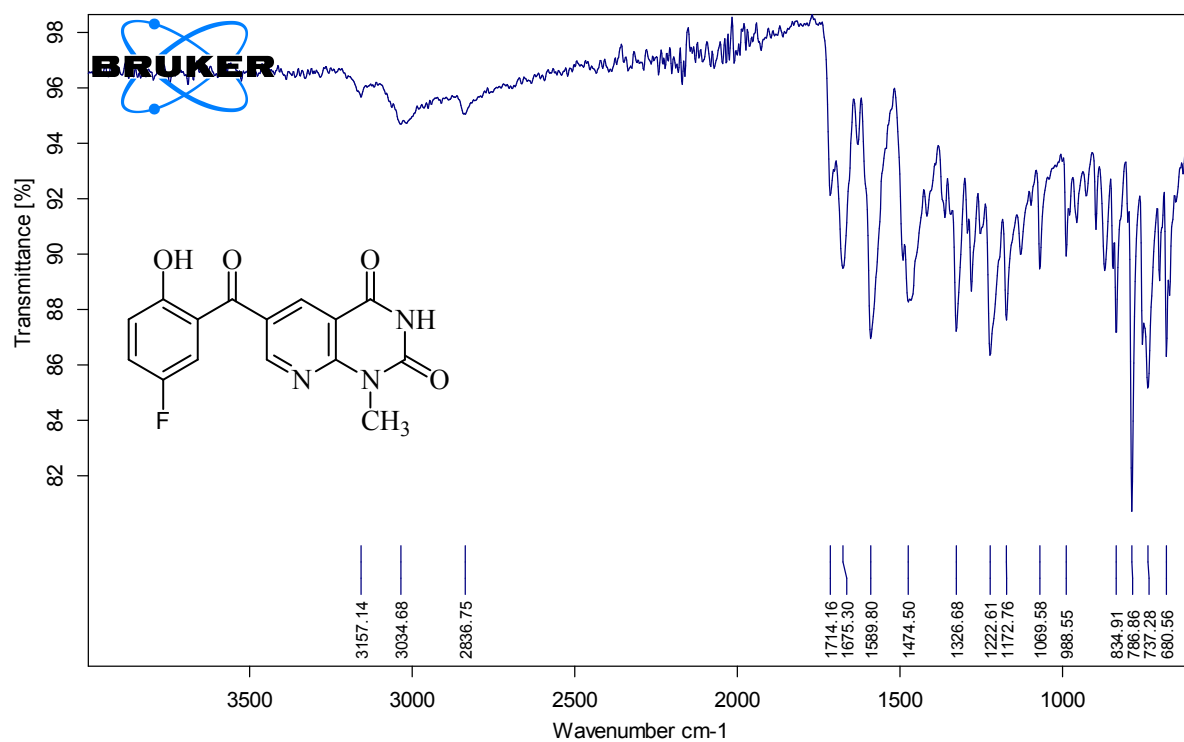

**Figure S2:** Experimental FT-IR spectrum of **6b**

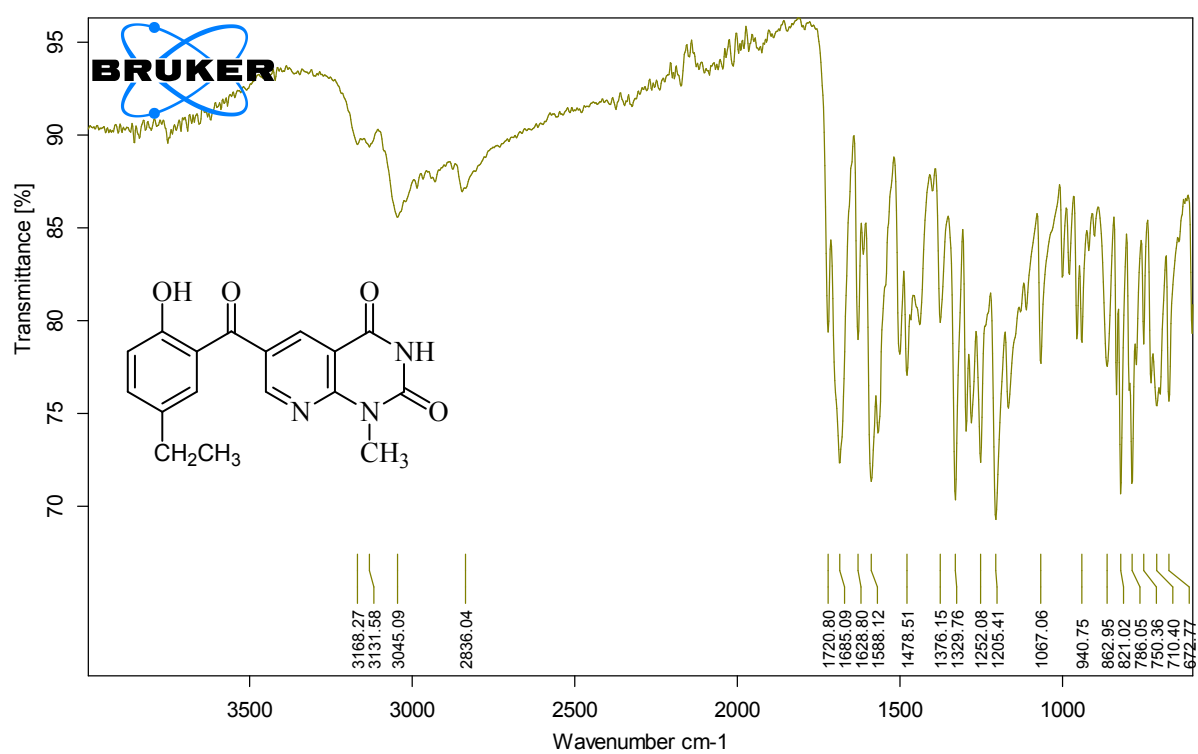

**Figure S3:** Experimental FT-IR spectrum of **6c**

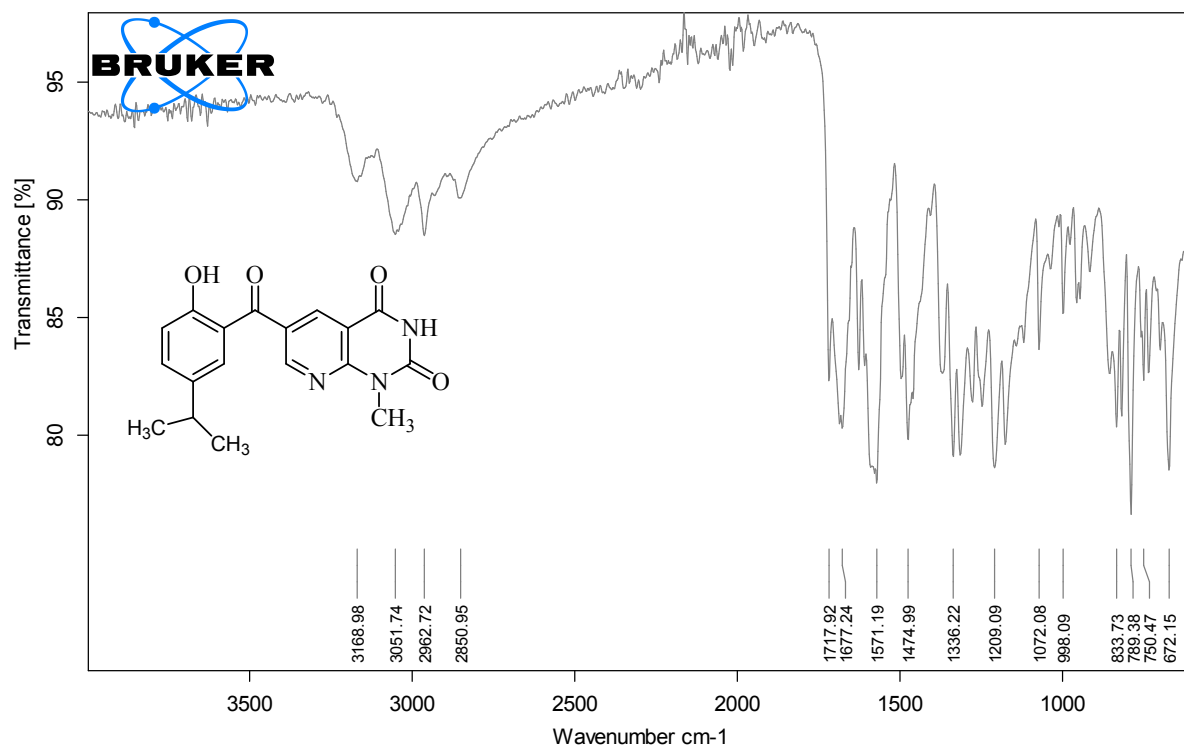

**Figure S4:** Experimental FT-IR spectrum of **6d**

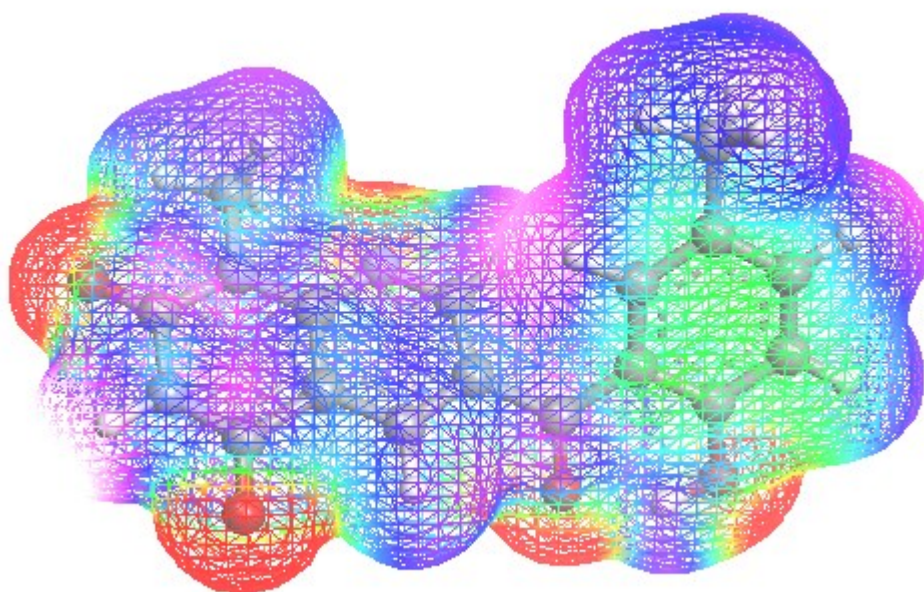

**6a**

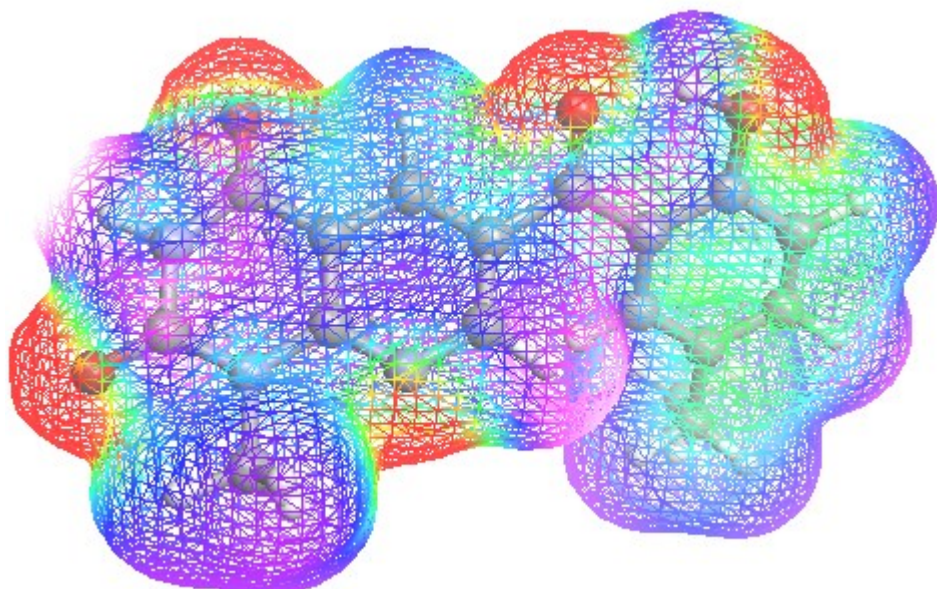

6c

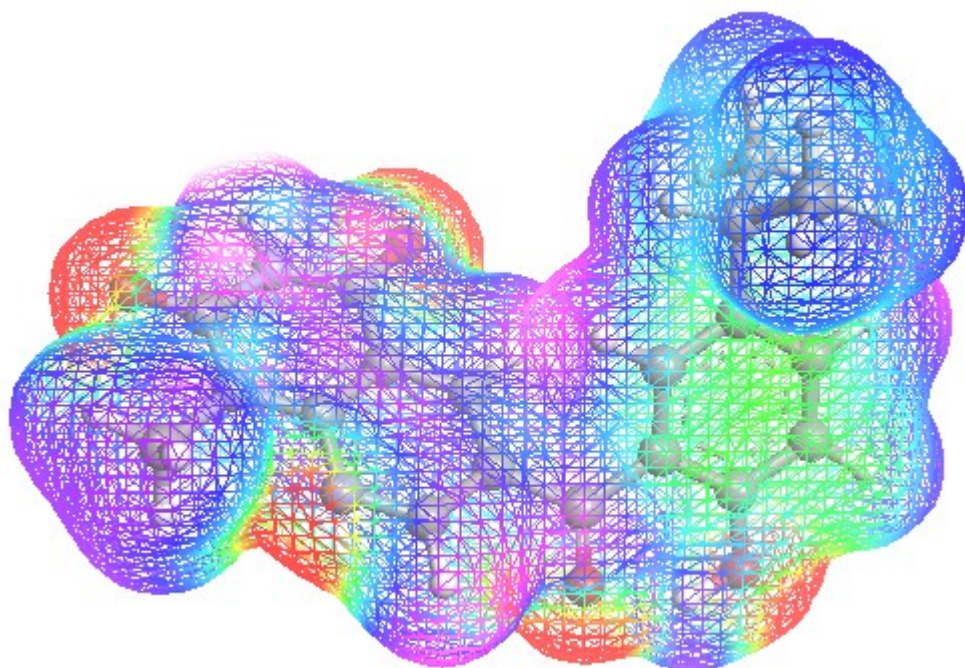

6d



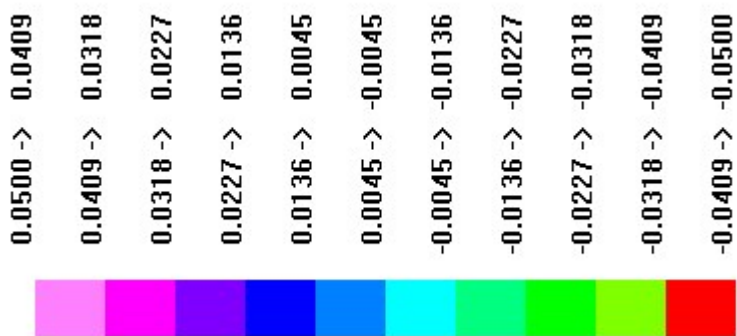

Figure S5: MEP surfaces of 6a-d

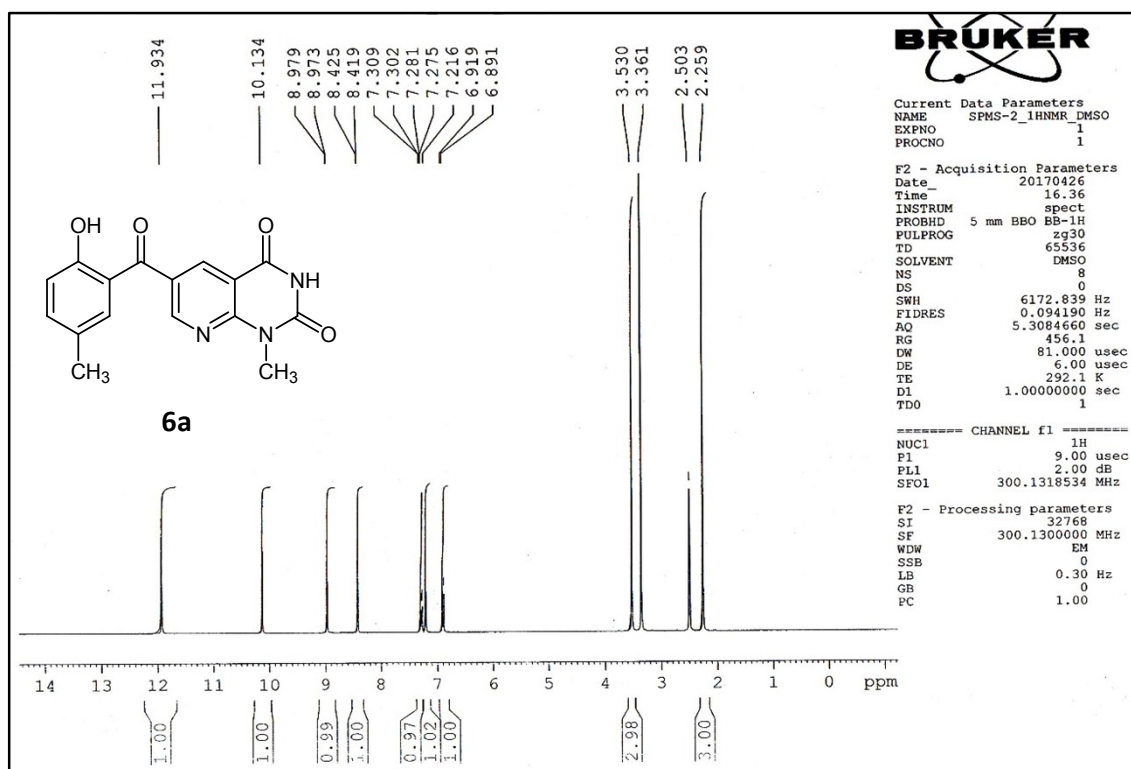



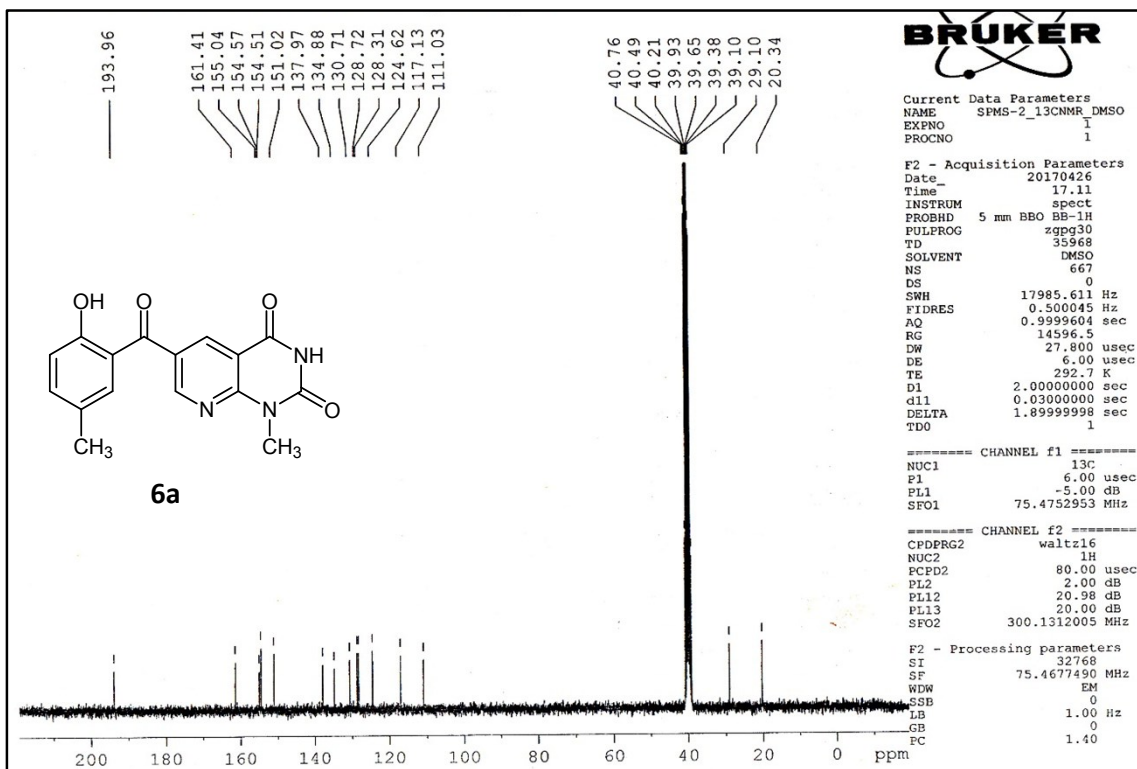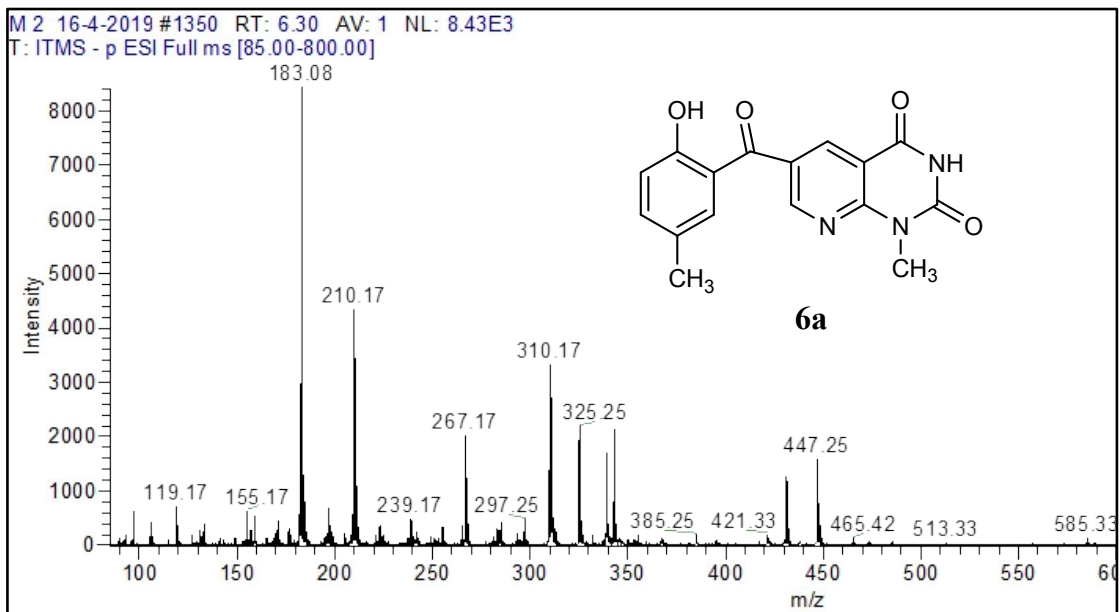

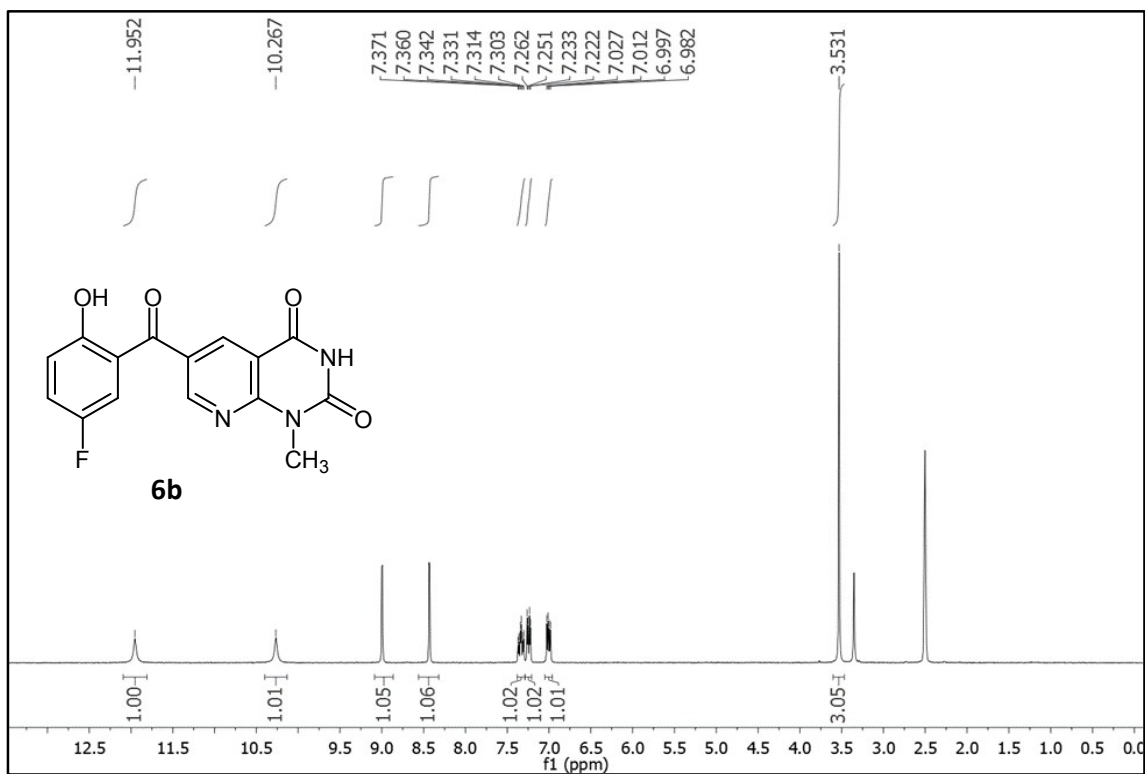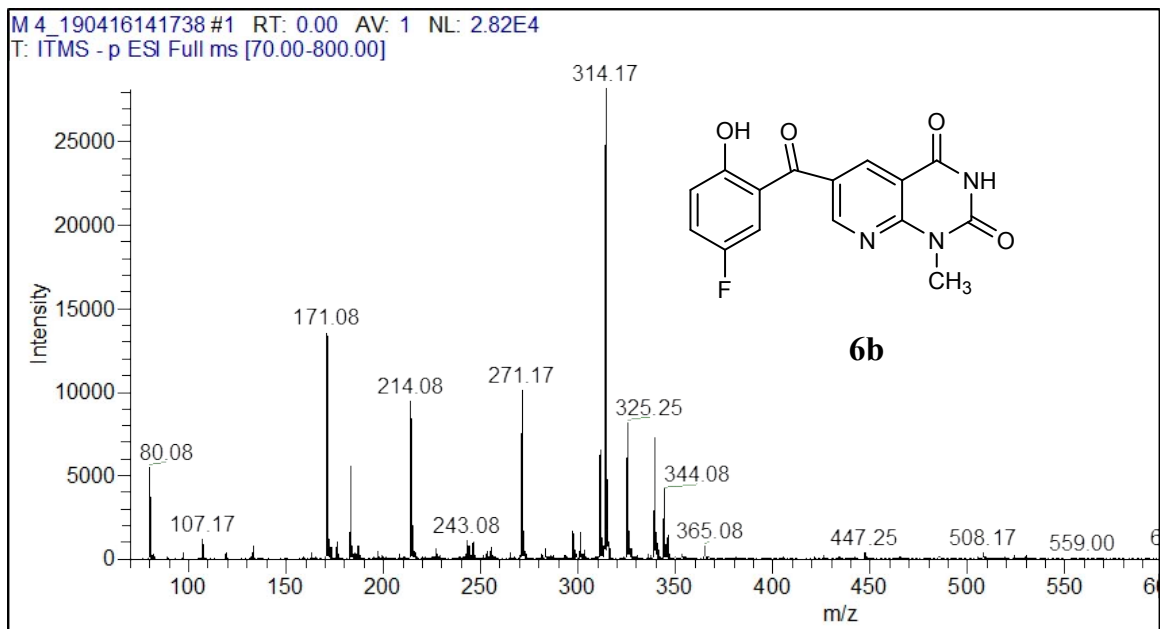

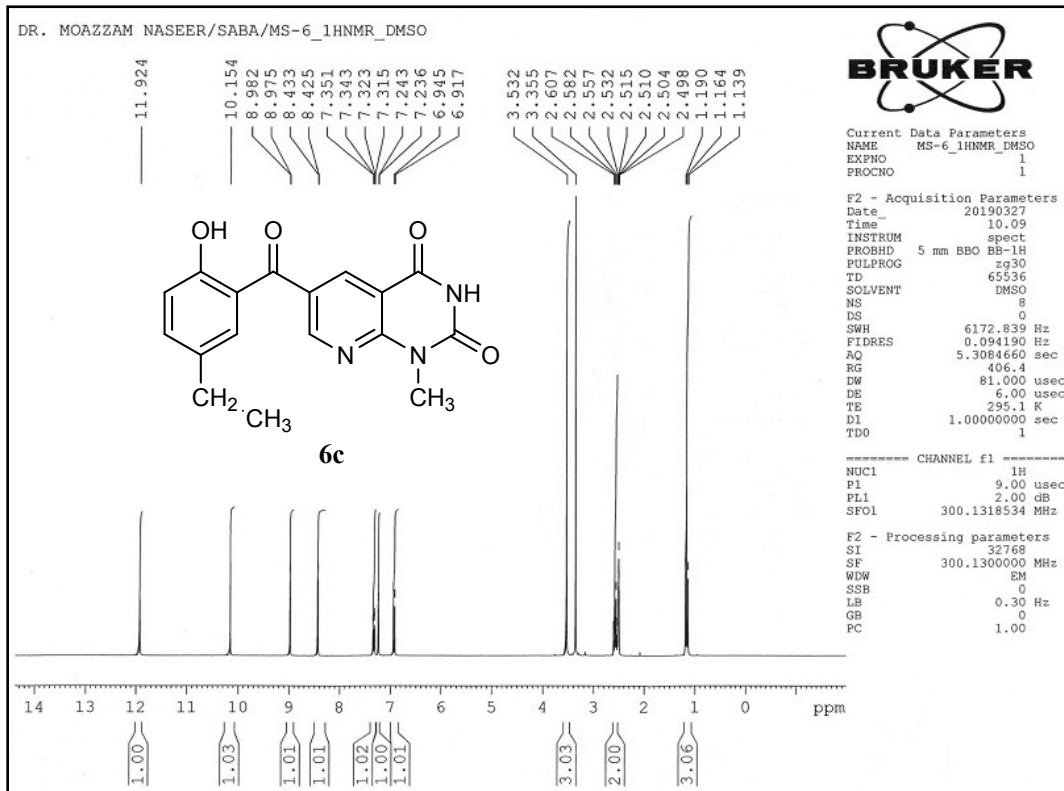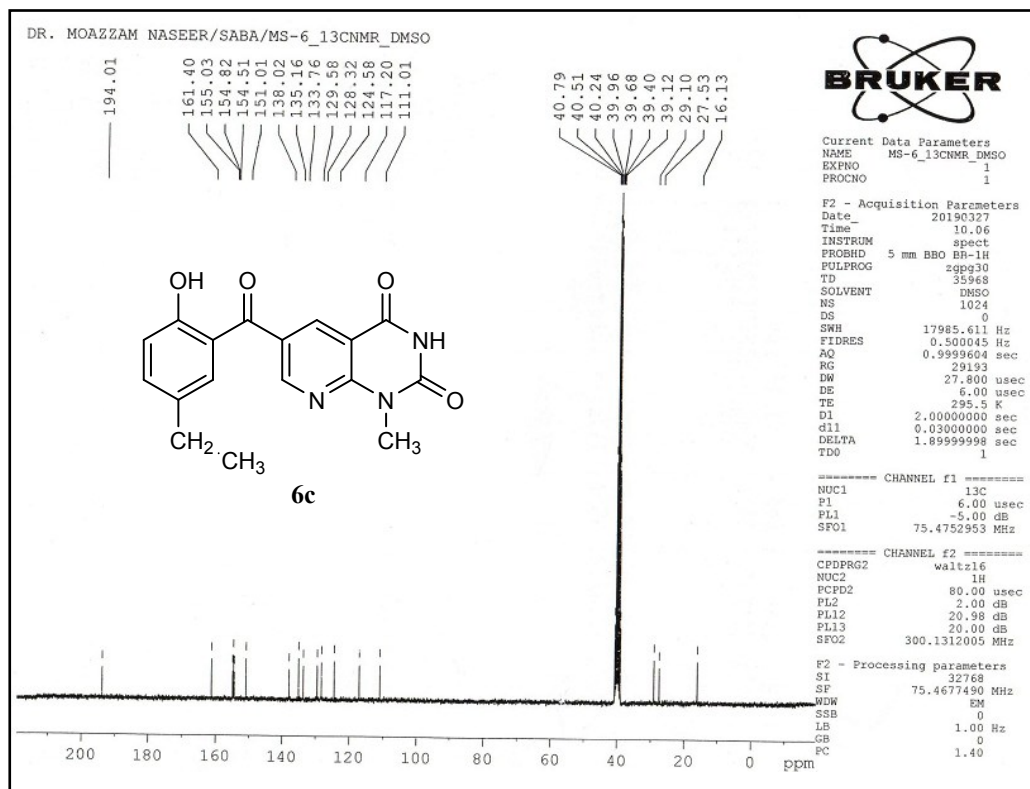

M-6\_190502101727 #156 RT: 0.49 AV: 1 NL: 3.43E4  
 T: ITMS + p ESI Full ms [150.00-400.00]

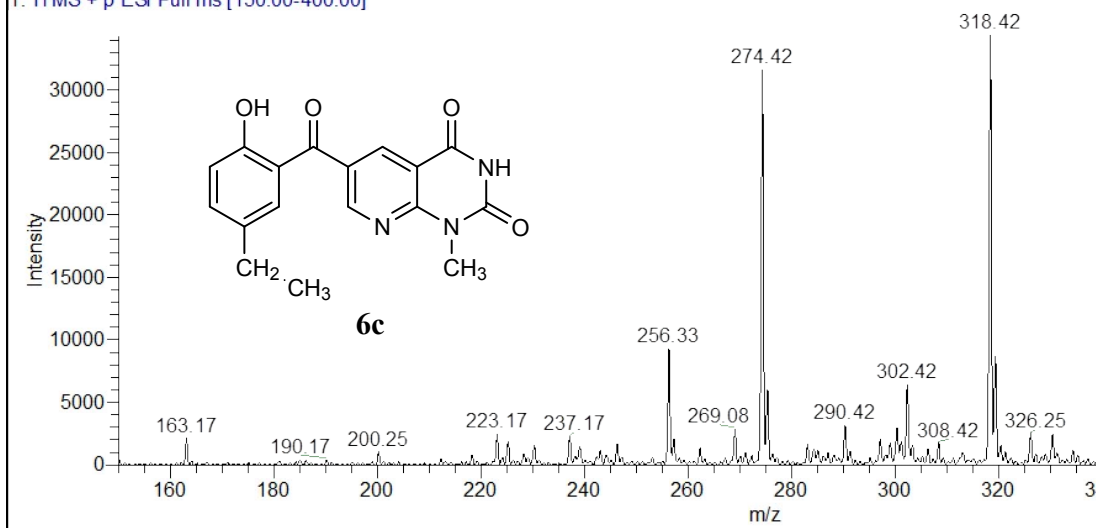

DR. MOAZZAM NASEER/SABA/MS-7\_1HNMR\_DMSO

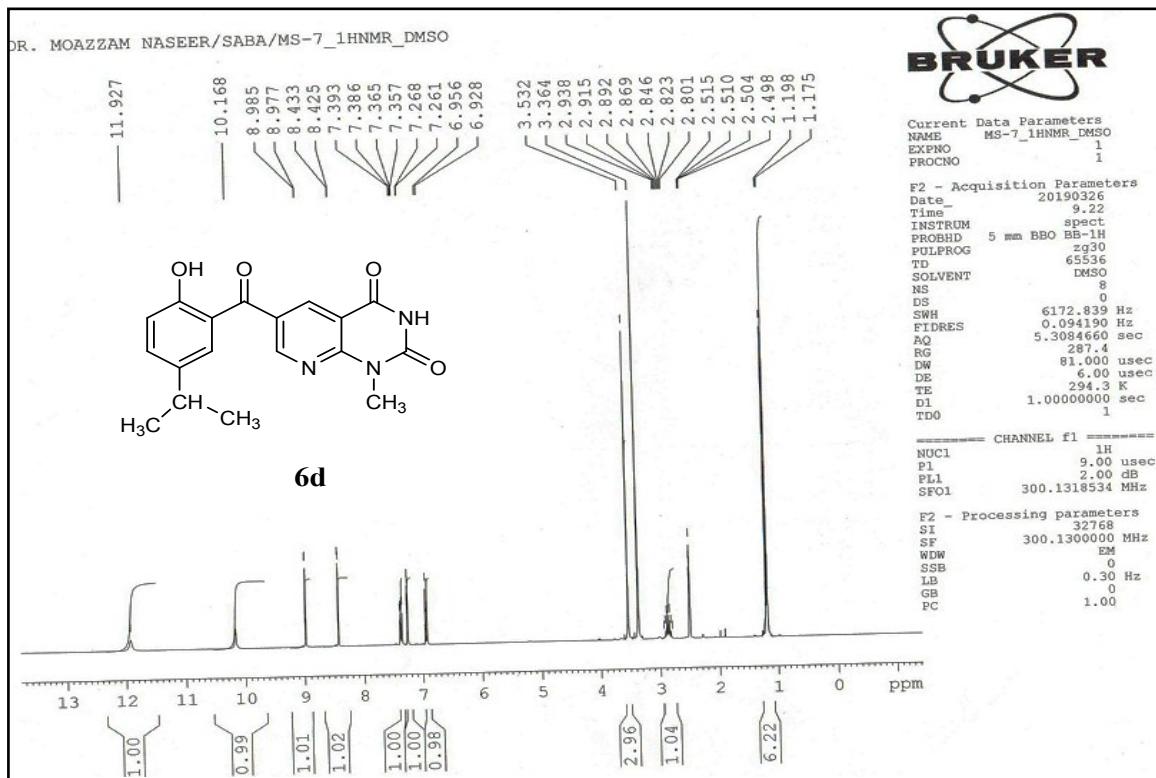

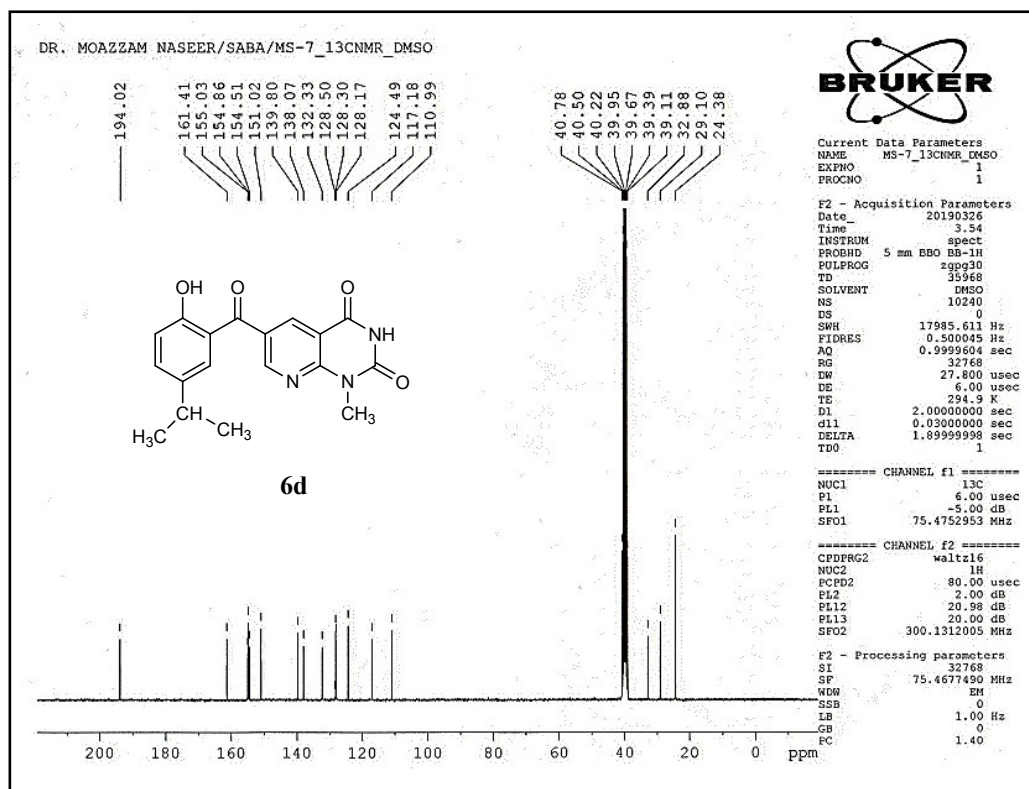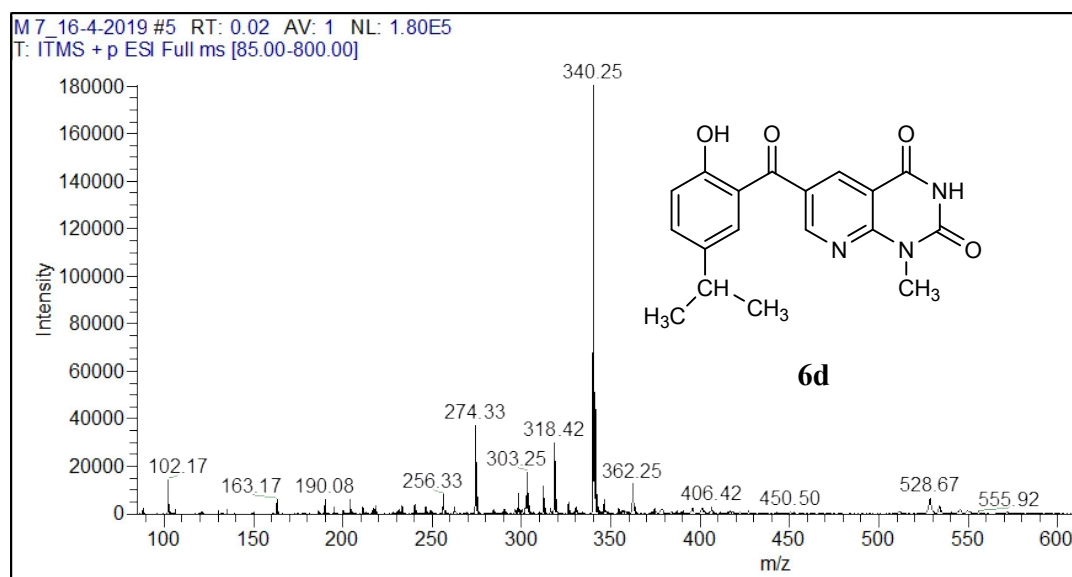

Figure S6: Spectroscopic spectra of 6a-d
